1 **VR-based real-time imaging reveals abnormal cortical dynamics during**  
2 **behavioral transitions in a mouse model of autism**

3

4 **Short title**

5 **Abnormal cortical dynamics during behavior in ASD mice**

6

7 Nobuhiro Nakai<sup>1,2</sup>, Masaaki Sato<sup>1,3\*</sup>, Okito Yamashita<sup>4,5</sup>, Yukiko Sekine<sup>1</sup>, Xiaochen Fu<sup>1</sup>,  
8 Junichi Nakai<sup>6</sup>, Andrew Zalesky<sup>7</sup>, Toru Takumi<sup>1,2,8,9\*</sup>

9

10 <sup>1</sup> RIKEN Brain Science Institute, Wako, Saitama 351-0198, Japan

11 <sup>2</sup> Department of Physiology and Cell Biology, Kobe University School of Medicine, Kobe 650-  
12 0017, Japan

13 <sup>3</sup> Department of Neuropharmacology, Hokkaido University Graduate School of Medicine, Kita,  
14 Sapporo 060-8638, Japan

15 <sup>4</sup> RIKEN Center for Advanced Intelligence Project, Chuo, Tokyo 103-0027, Japan

16 <sup>5</sup> Department of Computational Brain Imaging, ATR Neural Information Analysis Laboratories,  
17 Seika, Kyoto 619-0288, Japan

18 <sup>6</sup> Division of Oral Physiology, Department of Disease Management Dentistry, Tohoku  
19 University Graduate School of Dentistry, Aoba, Sendai 980-8575, Japan

20 <sup>7</sup> Melbourne Neuropsychiatry Centre and Department of Biomedical Engineering, The  
21 University of Melbourne, Victoria, 3010, Australia.

22 <sup>8</sup> RIKEN Center for Biosystems Dynamics Research, Chuo, Kobe 650-0047, Japan

23 <sup>9</sup> Lead contact

24 \*corresponding authors: TT, [takumit@med.kobe-u.ac.jp](mailto:takumit@med.kobe-u.ac.jp); MS, [msato@pop.med.hokudai.ac.jp](mailto:msato@pop.med.hokudai.ac.jp)

25

26 **Summary**

27 Functional connectivity (FC) can provide insight into cortical circuit dysfunction in  
28 neuropsychiatric disorders. However, dynamic changes in FC related to locomotion with  
29 sensory feedback remain unexplored. To investigate FC dynamics in locomoting mice, we  
30 developed mesoscopic Ca<sup>2+</sup> imaging with a virtual reality (VR) environment. We find rapid  
31 reorganization of cortical FC in response to changing behavioral states. Using machine learning  
32 classification, behavioral states are accurately decoded. We then use our VR-based imaging  
33 system to study cortical FC in a mouse model of autism and find that locomotion states are  
34 associated with altered FC dynamics. Furthermore, we identify FC patterns involving the motor  
35 area as the most distinguishing features of the autism mice from wild-type mice during  
36 behavioral transitions, which might correlate with motor clumsiness in patients with autism.  
37 Our VR-based real-time imaging system provides invaluable information to understand FC  
38 dynamics linked to a behavioral abnormality of neuropsychiatric disorders.

39

## 40 **Introduction**

41 Neocortical activity displays dynamic changes across multiple cortical areas to facilitate  
42 processing of sensory information and generate action outputs <sup>1</sup>. Such large-scale network  
43 dynamics can be investigated using functional connectivity (FC), defined as temporal  
44 dependence of neuronal activity between anatomically separated brain regions <sup>2</sup>. With  
45 functional magnetic resonance imaging (fMRI), FC is quantified as the extent of coactivation  
46 between spontaneous blood-oxygen-level-dependent (BOLD) signals during rest <sup>2,3</sup> or during  
47 task conditions necessitating minimal movement. FC can also be measured in rodents <sup>4</sup>.  
48 However, immobilization of a subject within an MRI scanner and the slow nature of BOLD  
49 signals in resting-state fMRI has limited the study of cortical activity during complex behaviors  
50 involving whole-body movement and locomotion. Although the ability to record sensory-  
51 evoked BOLD signals in awake head-restrained mice was recently developed <sup>5</sup>, techniques to  
52 measure FC during natural and voluntary movement in an interactive environment remain to  
53 be established.

54 FC provides a valuable tool for investigating functional brain network organization in  
55 autism spectrum disorder (ASD) <sup>6</sup>. A large body of resting-state fMRI studies reports functional  
56 under-connectivity (hypo-connectivity), over-connectivity (hyper-connectivity), and a  
57 combination of both global and local alterations in the ASD brain <sup>7</sup>. In addition, machine  
58 learning models can be trained to predict an individual's diagnostic status using their FC,  
59 although clinical heterogeneity is a significant challenge <sup>8,9</sup>. In contrast to resting-state and task  
60 conditions, cortical dynamics during voluntary behaviors such as locomotion remain to be  
61 understood, particularly in neuropsychiatric disorders. Individuals with ASD exhibit motor  
62 coordination deficits <sup>10</sup> and impairment of movement planning in goal-directed locomotion <sup>11,12</sup>.  
63 Furthermore, accumulating evidence suggests that sensorimotor difficulties seen in ASD are  
64 strongly associated with the development and maintenance of social and non-social core  
65 symptoms <sup>13</sup>.

66 In this study, we sought to elucidate the rapid reorganization of functional cortical  
67 networks during locomotion, focusing on periods transitioning between locomotion (i.e.,  
68 running) and rest conditions, in normal and ASD model mice. To this end, we developed an  
69 integrated Ca<sup>2+</sup> imaging and virtual reality (VR) platform to study neural activity in mice  
70 during VR locomotion, including statistical analysis of second-by-second FC dynamics, graph  
71 theoretical analysis of network structures, and machine learning classification of FC patterns  
72 using support vector machine (SVM). Cortex-wide mesoscopic Ca<sup>2+</sup> imaging enabled the

73 measurement of neural activity with high spatiotemporal resolution <sup>14,15</sup>. VR created an  
74 environment that simulated real-world situations for head-fixed mice and allowed us to  
75 manipulate sensory information <sup>16,17</sup>. Using this experimental and analytical framework, we  
76 assessed cortical FC of a copy number variation mouse model for human 15q11-13 duplication  
77 (*15 dup*) in different behavioral states. We previously reported that *15q dup* mice display ASD-  
78 like social communication deficits <sup>18,19</sup> and exhibit abnormal somatosensory tuning under  
79 anesthesia and whole-brain functional hypoconnectivity in awake resting-state fMRI <sup>5,20</sup>.  
80 However, cortical FC alterations during behavior remain unknown. Here, we found that these  
81 mice exhibited impaired locomotion-dependent FC dynamics and aberrant FC patterns  
82 involving hyperconnectivity of the motor areas, highlighting the importance of motor areas in  
83 cortical FC dysfunction during spontaneous behavioral switching in ASD.

84

## 85 **Results**

86 To measure cortical FC in mice engaged in voluntary movement, we used transcranial Ca<sup>2+</sup>  
87 imaging combined with a head-fixed VR system (**Figures 1A–1C; STAR Methods**). The  
88 virtual environment mimicked a realistic open-field enclosure and consisted of a two-  
89 dimensional square arena with differently colored walls (**Figure 1B**). We crossed Emx1-Cre  
90 driver mice, which allows extensive Cre-mediated recombination in the forebrain, with Ai95D  
91 mice to express the genetically-encoded calcium indicator GCaMP6f in cortical excitatory  
92 neurons of the offspring Emx1G6 mice (**Figure 1D; STAR Methods**). During a 10-min VR  
93 session, mice exhibited voluntary locomotion (speed > 0.5 cm/s) in this virtual arena; they  
94 spent  $58.7 \pm 19.7$  % of the total duration in a state of locomotion (mean  $\pm$  SD,  $n = 89$  sessions  
95 from 7 mice). For further analysis, we excluded periods of frequent alterations between  
96 locomotion and rest and focused only on long episodes (continuously  $\geq 3$  s) of locomotion and  
97 rest (**Figure 1E**). The percentage of time spent in long locomotion and rest was  $50.3 \pm 22.1$  %  
98 and  $32.5 \pm 20.2$  %, respectively (mean  $\pm$  SD,  $n = 89$  sessions from 7 mice). Average lengths of  
99 long locomotion and rest episodes were  $10.0 \pm 5.4$  s (mean  $\pm$  SD,  $n = 2,836$  episodes from 89  
100 sessions) and  $9.4 \pm 6.6$  s, (mean  $\pm$  SD,  $n = 1,903$  episodes from 89 sessions), respectively. There  
101 were no significant changes in these behavioral parameters across sessions (**Figure 1F**). We  
102 imaged cortical fluorescence changes at a frame rate of 30 frames per second in 50 ROIs  
103 (regions of interest) that covered most of the dorsal cortical subregions (**Figures 1G and 1H;**  
104 **Figures S1 and S2; STAR Methods**). Pair-wise correlation coefficients were computed  
105 between cortical ROIs at a temporal scale of a second, using a one-frame sliding window. We

106 then applied graph-theoretic analyses to characterize the resulting network dynamics and  
107 visualized highly correlated ROI pairs ( $r > 0.8$ ) using an FC map (**Figure 1H; STAR Methods**).

108

### 109 **Graph analysis of cortical network dynamics during behavioral transitions**

110 First, we examined the activity of different cortical areas during behavioral transitions from  
111 long rest to long locomotion (locomotion onset,  $n = 566$  events from 89 sessions) and from  
112 long locomotion to long rest (locomotion cessation,  $n = 643$  events from 89 sessions; **Figure**  
113 **2A**). During a period that spanned 3 s before and after the onset of locomotion, many cortical  
114 areas displayed marked transient increases in fluorescence intensity that began slightly prior to  
115 the onset ( $dF/F$ ;  $0.05 \pm 0.27$  % at  $-0.5$  s;  $0.62 \pm 0.45$  % at 0 s;  $n =$  all 50 ROIs, mean  $\pm$  SD;  
116 **Figure 2A**). In contrast, the fluorescence intensity of all areas rapidly and substantially  
117 decreased immediately after the cessation of locomotion ( $-0.06 \pm 0.12$  % at 0 s;  $-0.54 \pm 0.34$  %  
118 at 0.5 s; **Figure 2A**). Such large signal changes were not observed during control periods that  
119 were randomly selected independent of the locomotion state ( $-0.01 \pm 0.03$  % at  $-0.5$  s;  $-0.03$   
120  $\pm 0.04$  % at 0 s;  $0.01 \pm 0.03$  % at 0.5 s; **Figure 2A**). Hierarchical clustering of regional  
121 fluorescence signals revealed that response profiles of all ROIs during the onset periods could  
122 be divided into two major clusters; one represented the considerable transient activity of  
123 sensory (V1, HL, FL, etc.) and association (PT, RS, etc.) areas and the other represented  
124 sustained activity of the motor-related regions (M1, M2, etc.; **Figure S3A**). On the other hand,  
125 clustering of activity around the locomotion cessation differentiated M2 and CG from the major  
126 clusters (**Figure S3B**).

127 Next, we investigated cortical FC dynamics during transition periods by visualizing  
128 indices that represent network centrality of each cortical area. Node degree captures the extent  
129 to which a region connects with other regions. Betweenness centrality measures how much a  
130 region is in-between other regions<sup>21</sup>. Before locomotion onset, FC among posterior areas (blue  
131 and green edges), most notably bilateral HL, TR, PT, and Vm, gradually increased (time  
132 window from  $-3$  to  $-1$ , **Figure 2B top**) and node degree also increased in many areas ( $15.8 \pm$   
133  $5.9$  at  $-3$  s;  $20.9 \pm 6.3$  at  $-1$  s;  $n =$  all 50 ROIs, mean  $\pm$  SD; **Figure 2C**). At locomotion onset,  
134 FC among posterior regions rapidly decreased, and highly correlated networks among anterior  
135 motor areas (orange and red edges) subsequently emerged (**Figure 2B top**). The node degree  
136 of most areas rapidly declined after locomotion onset ( $15.4 \pm 3.6$  at 1 s,  $n =$  all 50 ROIs, mean  
137  $\pm$  SD), although the primary motor area remained elevated (M1p,  $13.5 \pm 0.7$  at  $-3$  s;  $16.7 \pm 0.7$

138 at  $-1$  s;  $17.7 \pm 0.1$  at 1 s,  $n = 2$  ROIs; **Figure 2C**). At the cessation of locomotion, the dense  
139 anterior networks among motor areas disappeared, and the FC among posterior regions re-  
140 emerged (**Figure 2B middle**). These locomotion-dependent dynamic reconfigurations of  
141 functional network architecture were absent during random control periods (**Figure 2B**  
142 **bottom**). Taken together, the results demonstrate that the correlation among anterior motor  
143 areas becomes dominant over posterior sensory/association cortices during locomotion,  
144 whereas this reciprocal relationship between anteroposterior cortical domains is reversed  
145 during rest.

146 The betweenness centrality of M1p remained high during locomotion (**Figure 2D**),  
147 consistent with the notion that the primary motor area plays a pivotal role in voluntary  
148 movement. In addition, the betweenness centrality of the CG and PTa increased rapidly at  
149 locomotion onset, and PTa was high again immediately before cessation of locomotion. In  
150 contrast, TR and Vma displayed delayed rises after the onset and peaked immediately before  
151 cessation (**Figure 2D**). Fluorescence changes of each ROI were significantly correlated with  
152 node degree but not with betweenness centrality before locomotion onset (**Figure S4**),  
153 indicating that these functional network properties do not directly reflect the magnitude of  
154 fluorescence changes. These findings suggest that locomotion onset and cessation do not  
155 necessarily mirror each other, and hub structure dynamically changes within the period of  
156 locomotion. Moreover, we found significant increases in characteristic path length (CPL), a  
157 measure of the efficiency of information transfer that represents the average shortest path  
158 length between all region pairs (**Figure 2E**), and modularity  $Q$ , which means the extent to  
159 which the network is subdivided into nonoverlapping groups of regions (**Figure 2F**). These  
160 findings suggest that functional cortical networks manifest a more modular structure during  
161 movement than during rest periods of no locomotion. We found that correction for  
162 hemodynamic signals did not significantly impact these findings (**Figure S5**).

163

## 164 **Role of visual feedback in behavioral state-dependent cortical network dynamics**

165 Animals use visual information to explore external environments. To investigate the role of  
166 visual sensory processing on our results, we tested mice exploring a virtual environment with  
167 no projection of visual landscape (**Figure 3**). In this condition, mice spent  $46.9 \pm 24.8$  % and  
168  $35.2 \pm 24.6$  % of total time engaged in long locomotion and rest, respectively (mean  $\pm$  SD;  
169 long locomotion,  $P = 0.38$ , vs. control; long rest,  $P = 0.46$ , vs. control, t-test,  $n = 71$  sessions

170 from 17 mice). Total distances traveled did not differ significantly from the control experiments  
171 with projection (**Figure 3B**). However, the mice often exhibited local circling and were  
172 impeded by invisible walls and corners when they explored without visual feedback (**Figure**  
173 **3A**). As a result, they traversed a significantly smaller area within the arena (**Figure 3C**). These  
174 results demonstrate that vision provides important sensory information when mice explore the  
175 virtual arena.

176 We then examined FC dynamics under no visual feedback. The fluorescence changes  
177 at locomotion onset and cessation were comparable to those in the control experiments except  
178 for larger and smaller amplitudes in CG (mean  $\pm$  SD;  $136.8 \pm 34.0$  %, vs. control,  $n = 71$   
179 sessions from 17 mice) and V1a ( $67.1 \pm 19.9$  %), respectively (**Figures 3D and 2A**). While FC  
180 networks were similar to those in the control experiments (**Figures 3E and 2B**), the number of  
181 connections during locomotion was significantly higher under no projection (**Figures 3F, 3H,**  
182 **and 2C**, after onset and before cessation). As in control experiments, the betweenness  
183 centrality of M1p was constantly high during locomotion. However, these centralities of CG,  
184 TR, and Vma were substantially reduced (no projection,  $102.8 \pm 41.7$ ; control,  $145.5 \pm 33.7$ ;  
185 mean  $\pm$  SD,  $n = 6$  ROIs; **Figures 3G and 2D**), which led to significant decreases in overall  
186 betweenness centrality during locomotion (**Figure 3I**). Furthermore, CPL and modularity Q  
187 were also significantly reduced during locomotion onset (**Figure 3J–3K**). These results  
188 indicate that the lack of visual feedback markedly weakens the network modularity of  
189 locomotion-dependent cortical FCs.

190 Desynchronization of cortical population activity often manifests when animals  
191 engage in a task<sup>22</sup>. Using the network-based statistic (NBS)<sup>23</sup>, we next tested for changes in  
192 FC during transitions between rest and locomotion. Importantly, this analysis allowed us to  
193 identify FCs that exhibited not only significantly higher correlations but also significantly  
194 lower correlations (i.e., decorrelation). In the control experiments, we observed gradual and  
195 marked increases in FC among posterior sensory areas and emergence of decorrelated  
196 subnetworks of anterior motor areas before locomotion onset (time window from  $-3$  to  $-1$ ,  
197 **Figure 4A**). After locomotion began, long-range decorrelations among anterior (motor areas),  
198 parietal (CG) and posterior (visual areas) cortices rapidly emerged, followed by robust  
199 decorrelations among posterior sensory cortices 2–3 s after locomotion onset (**Figure 4A**). In  
200 contrast, persistently decorrelated subnetworks of posterior sensory cortices during locomotion  
201 expanded to include M2 immediately before locomotion cessation, followed by the emergence  
202 of sustained decorrelations among anterior motor cortices and widespread transient

203 correlations among posterior sensory cortices beginning 1–2 s after cessation (**Figure 4B**).

204 The emergence of dense (de)correlated networks among sensory areas during  
205 behavioral transitions suggests that sensory processing could profoundly affect FC during these  
206 periods. Interestingly, we found that the decorrelated but not correlated networks markedly  
207 diminished in the condition with no projection of visual landscape (**Figures 4C and 4D**). Rapid  
208 decorrelations between M2 and V1 at ~1 s after locomotion onset and delayed decorrelations  
209 among posterior sensory areas, including not only visual but also somatosensory cortices, at  
210 ~3 s after locomotion onset were almost absent (**Figure 4C**), although decorrelations between  
211 CG and V1 and correlations between bilateral visual areas at ~1 s after locomotion onset  
212 remained. Persistent decorrelations among posterior sensory areas before cessation and  
213 transient correlations among those areas ~2 s after the cessation were considerably weakened  
214 (**Figure 4D**). Collectively, these results demonstrate that the absence of visual feedback  
215 markedly alters exploration behavior and dynamics of multiple functional subnetworks  
216 primarily involving the visual cortex, such as long-range anteroposterior FCs between motor  
217 and visual cortices and cross-modal FCs between somatosensory and visual cortices.

218

### 219 **Decoding behavioral dynamics using functional cortical network**

220 Having found that the transitions between states of rest and locomotion were each characterized  
221 by distinct cortical network architectures, we next tested whether an animal's behavioral state  
222 can be decoded from its cortical network. To this end, we trained support vector machine  
223 (SVM) classifiers using datasets of FC containing all time frames from four mice (train set)  
224 and classified FCs for the remaining three mice (test set) into two behavioral states. This was  
225 repeated for all combinations of mouse assignments to test and train sets. Accuracy of the out-  
226 of-sample classification (Test, 88.9%, median,  $n = 35$  classifiers) was comparable to the level  
227 achieved by classification for the train set (Train, 89.0%) and substantially higher than expected  
228 due to chance, as determined by randomly shuffling classification labels (Shuffled, 58.3%;  
229 **Figure 5A**). Incorrect classification mainly occurred during short periods flanking the state  
230 transition, and classification accuracy was highest during continuing locomotion and rest  
231 periods. However, accuracies remained modest during the intermediate periods in which two  
232 contrasting states coexisted (time window from -1 to 1, **Figure 5B**). Accordingly, the accuracy  
233 of classification increased to 92.3 % ( $n = 1,326,379$  frames from 89 sessions) when the periods  
234 of short locomotion and rest episodes (less than 3 s) were excluded, whereas accuracy within



235 the periods of short episodes was 65.0 % ( $n = 275,621$  frames from 89 sessions).

236 To identify the features that contributed significantly to the classification, we sorted  
237 all FCs according to feature weights and found that M1, Mou, FL, and HL were significantly  
238 overrepresented in the top 0.5 % and bottom 0.5 % FCs (6 FCs each) (**Figure 5C**). We then  
239 retrained the classifiers using these top 0.5 % and bottom 0.5 % FCs and achieved classification  
240 accuracies that were comparable to the classifier trained with all FCs (Top+Bottom, 84.2 %;  
241 **Figure 5D**) and significantly better than the classifiers trained with a randomly selected 1 %  
242 of all FCs (Random, 71.0 %; **Figure 5D**). Collectively, these results demonstrate that  
243 connectivity of the primary motor and primary somatosensory forelimb, hindlimb, and mouth  
244 areas contains information sufficient for highly accurate differentiation of locomotion and rest  
245 states.

246

## 247 **Functional hyperconnectivity and impaired locomotion-dependent dynamics in the** 248 **cortex of a mouse model of ASD**

249 We applied our VR-based imaging system to investigate behavior-dependent cortical network  
250 dynamics of ASD model mice. We used *Emx1G6<sup>15q dup</sup>* mice that possessed the paternal  
251 duplication of the mouse syntenic region of human 15q11-13 and expressed GCaMP6f in  
252 excitatory neurons in the cortex. *Emx1G6<sup>15q dup</sup>* mice showed lower locomotor activity in the  
253 virtual arena during 10-min sessions (**Figures 6A and 6B**). They spent  $25.8 \pm 17.1$  % and  $59.1$   
254  $\pm 21.3$  % of total time engaged in long locomotion and rest, respectively (mean  $\pm$  SD; long  
255 locomotion,  $P = 5.3 \times 10^{-14}$ , vs. *Emx1G6*; long rest  $P = 6.9 \times 10^{-15}$ , vs. *Emx1G6*; t-test,  $n = 88$   
256 sessions from 9 mice; **Figure 6C**), and average lengths of long locomotion and rest per episode  
257 were  $9.0 \pm 4.2$  s ( $P = 0.17$ , vs. *Emx1G6*, t-test,  $n = 1,523$  episodes from 88 sessions) and  $20.5$   
258  $\pm 14.7$  s ( $P = 2.7 \times 10^{-9}$ , vs. *Emx1G6*, t-test,  $n = 1,882$  episodes from 88 sessions), respectively.  
259 Functional sensory mapping confirmed that locations and response amplitudes of primary  
260 somatosensory subareas were not markedly different between *Emx1G6<sup>15q dup</sup>* mice and  
261 *Emx1G6* mice (**Figure S7**), although the area responsive to whisker stimuli was larger in  
262 *Emx1G6<sup>15q dup</sup>* mice (**Figures S7C and S7D**), as reported in our previous study<sup>20</sup>.

263 Although the fluorescence changes at locomotion onset and cessation in *Emx1G6<sup>15q</sup>*  
264 *dup* mice were generally similar to those in *Emx1G6* mice (**Figure 6D**, see also Figure 2A), the  
265 magnitude of changes in a few areas, such as PTa (mean  $\pm$  SD; *Emx1G6<sup>15q dup</sup>*,  $-0.10 \pm 0.21$  %;  
266 *Emx1G6*,  $1.33 \pm 0.29$  % at 0 s) and BCm (*Emx1G6<sup>15q dup</sup>*,  $-0.15 \pm 0.20$  %; *Emx1G6*,  $0.63 \pm$

267 0.15 % at 0 s), were low (**Figure 6D**). These differences were not likely due to different  
268 baseline fluorescence levels in *Emx1G6<sub>15q dup</sub>* mice, as average fluorescence intensities of each  
269 cortical area were only slightly higher in these mice (**Figure S6**). The overall patterns of FC  
270 networks in *Emx1G6<sub>15q dup</sub>* mice were also similar to those in *Emx1G6* mice (**Figure 6E**, see  
271 also Figure 2B). However, the strength of FC appeared higher in *Emx1G6<sub>15q dup</sub>* mice,  
272 particularly FCs connecting ROIs in anterolateral motor cortices (i.e., M1 and M2) and FCs  
273 bridging anterior and posterior cortex (e.g., M1, PT, and RS) during locomotion (**Figure 6E**),  
274 as supported by generally larger node degrees compared with *Emx1G6* mice (**Figures 6F and**  
275 **6H**). In *Emx1G6<sub>15q dup</sub>* mice, betweenness centrality, CPL, and modularity Q were significantly  
276 lower than in *Emx1G6* mice during locomotion (**Figures 6I–6K**), suggesting that cortical  
277 hyperconnectivity results in a less modularized, more interconnected network in behaving  
278 *Emx1G6<sub>15q dup</sub>* mice. Given the baseline hyperconnectivity in *Emx1G6<sub>15q dup</sub>* mice, surprisingly  
279 fewer locomotion-dependent decorrelations were detected, particularly in the posterior cortex  
280 (**Figure S8**). These findings collectively demonstrate that functional cortical networks in  
281 *Emx1G6<sub>15q dup</sub>* mice exhibit hyperconnectivity and enhanced interconnectivity, but a  
282 locomotion-related reconfiguration of network architecture is dampened compared to *Emx1G6*  
283 mice.

284

### 285 **Diagnosis of ASD model mice using temporal FC during behavioral transitions**

286 Compared to *Emx1G6* mice, we found that *Emx1G6<sub>15q dup</sub>* mice were characterized by  
287 significant hyperconnectivity of M2 and M1 areas during the transitions, most notably 1 s after  
288 onset and 2 s after cessation of movement (**Figures 7A and 7B**). Bilateral connections of  
289 somatosensory nodes (especially HL and TR) were significantly decorrelated compared with  
290 *Emx1G6* mice regardless of behavioral state (**Figures 7A and 7B**). In addition, FCs between  
291 PT and M1, M2, FL, and HL showed decorrelation during locomotion, most evidently before  
292 cessation (**Figure 7B**).

293 To identify FC features that most distinguished *Emx1G6<sub>15q dup</sub>* mice from *Emx1G6*  
294 mice, we conducted SVM classification of FC during locomotion onset and cessation into the  
295 two genotypes. The SVM classifiers trained with all features (All FCs) at each time point  
296 during behavior transitions accurately classified the *Emx1G6<sub>15q dup</sub>* and *Emx1G6* genotypes  
297 (**Figures 7C–7F**). As with behavior state classification, the SVM classifiers trained with top  
298 0.5 % and bottom 0.5 % features (Top+Bottom) performed comparably to the classifiers trained

299 with all FCs, and significantly more accurately classified FC than the classifiers trained with  
300 randomly selected 1 % features (Random) at all time points (**Figures 7C and 7D**). FCs  
301 including M2 and M1 were significantly over-represented in the top 0.5% and bottom 0.5%  
302 features (**Figures 7E and 7F**), pointing to these cortical areas as key nodes that primarily  
303 contribute to deficits of cortical processing during spontaneous behavioral switching of  
304 *Emx1G6<sub>15q dup</sub>* mice.

305 Finally, we tested the importance of the behavior transition periods for genotype  
306 classification. The accuracies of classifiers trained with data from the locomotion that occurred  
307 within the transition periods (median accuracy, After-On, 100 %; Before-Ces, 100 %; **Figure**  
308 **7G**) were significantly higher than those trained with data from continuous locomotion outside  
309 the transition (Out, 56.3 %; **Figure 7G**). Similarly, classifiers trained with datasets from the  
310 rest that occurred within the transition periods more accurately classified FC into the right  
311 genotype than classifiers trained with the data from continuous rest periods outside the  
312 transition (Before-On, 92.9 %; After-Ces, 100 %; Out, 84.5 %; **Figure 7H**). In summary, these  
313 results demonstrate that the distinguishability of FC is greater during transition periods than  
314 during continuous locomotion and rest.

315

## 316 **Discussion**

317 In this study, we investigated locomotion-induced changes in rapid cortico-cortical FC on the  
318 time scale of seconds by taking advantage of an integrated platform for mesoscopic  $\text{Ca}^{2+}$   
319 imaging and VR that allows mice to run spontaneously with sensory feedback. Neural activity  
320 signals obtained using fluorescent  $\text{Ca}^{2+}$  indicator proteins are faster and typically more spatially  
321 resolved than BOLD signals. FC measured using fMRI and mesoscopic functional imaging is  
322 shown to overlap mainly with underlying structural connectivity<sup>24–26</sup> and reflect the correlation  
323 of modulation of neuronal spiking and LFP (local field potential) power between brain regions  
324<sup>27–29</sup>. Our correlation-based FC analysis thus highlighted communication and interaction  
325 between cortical areas based on the level of local activity.

326

## 327 **Cortical FC dynamics during behavioral transitions with and without visual feedback**

328 The locomotion-dependent cortical functional network changes revealed in this study align  
329 with previous observations<sup>27,30–34</sup>. Recent imaging studies demonstrate that M2, which has

330 dense reciprocal anatomic connections with sensory, parietal, and retrosplenial cortices <sup>35</sup>,  
331 orchestrates widespread cortical activity during motor learning and in a decision-making task  
332 <sup>30,33</sup>. In our study, in line with the view that M2 acts to link antecedent conditions such as  
333 sensory information to motor actions <sup>36</sup>, M2 showed a transient elevation of significant  
334 correlation with multiple sensory areas at 1–2 s ahead of locomotion onset, regardless of the  
335 presence or absence of visual feedback (Figures 4A and 4C). Recently, a study that investigated  
336 cortical FC dynamics during locomotion also highlighted the importance of M2 <sup>34</sup>. However,  
337 the role of sensory feedback for FC in this node had not been directly examined. Here, we  
338 found that FC between M2 and sensory cortices, including primary somatosensory cortex (S1)  
339 and primary visual cortex (V1), was decorrelated at 1 s after locomotion onset and  
340 demonstrated that this decorrelation completely disappeared when visual feedback was not  
341 available (Figures 4A and 4C). The implication is that locomotion with visual feedback drives  
342 V1 more strongly than without feedback and that direct top-down input from M2 to V1 sends  
343 motor-related signals for visual flow predictions <sup>31,32</sup>.

344 The FC associated with S1 significantly contributed to the SVM classification of  
345 locomotion and rest (Figure 5C). Remarkably, a dense correlated network among nodes of  
346 sensory areas, including S1, exhibited widespread and gradual augmentation over a period of  
347 2 s before locomotion onset, but this characteristic functional subnetwork was no longer  
348 evident once locomotion started (Figure 4A). This preparatory emergence of a correlated  
349 network is reminiscent of the synchronous oscillations observed in S1 during premovement  
350 attentive immobility <sup>37,38</sup> and is also consistent with the recent finding that S1 neuronal activity  
351 is highly correlated with the onset of movement and can control locomotion through a direct  
352 pathway independently of the motor cortex <sup>39</sup>. Our analysis of fast FC dynamics was thus able  
353 to capture a global picture of distributed transient functional subnetworks that may play a role  
354 in the preparation and initiation of voluntary movement.

355

### 356 **Cortical FC abnormalities in *15q dup* mice**

357 Our FC analysis of a mouse model of ASD uncovered previously unknown impairment of  
358 cortical circuit function such as widespread hyperconnectivity, less modularized network  
359 during locomotion, and FC patterns involving M2 and M1 as the most distinctive signature for  
360 *15q dup* mice.

361 It has been reported that individuals with ASD exhibit motor coordination deficits and  
362 impairment of movement planning in goal-directed locomotion<sup>10–12</sup>. Although various factors  
363 could influence the locomotor activity of mice, reduced time spent for long locomotion in  
364 *Emx1G6<sup>15q dup</sup>* mice might result from impaired motor planning and execution due to abnormal  
365 M2-related FC. While human dup15q syndrome shows a gait pattern of the slow pace, poor  
366 postural control, and large gait variability<sup>40</sup> and patients with paternal duplication in 15q11-  
367 13 display clumsy motor skill development<sup>41</sup>, *15q dup* mice were also reported to display mild  
368 motor impairment such as longer stride length and reduced stride frequency, and deficits in  
369 motor learning and cerebellar synaptic plasticity<sup>42</sup>. Since recent studies demonstrate that  
370 cerebellar output modulates preparatory activity in the anterolateral motor cortex<sup>43,44</sup>, the  
371 abnormal M2-related FC we observed during behavior state transitions may also arise as a  
372 consequence of deficiency of a more widespread functional network, potentially including  
373 interactions with extracortical brain regions.

374 Compared with *Emx1G6* mice, *Emx1G6<sup>15q dup</sup>* mice show significant decorrelation of  
375 FC that links M2, CG, S1, and PT during locomotion (Figures 7A and 7B). This subnetwork is  
376 reminiscent of the human lateral frontoparietal network (L-FPN), which consists of the rostral  
377 and dorsolateral prefrontal cortex and the inferior parietal cortex and participates in executive  
378 functions such as goal-directed cognition and task switching<sup>45</sup>. In task-based fMRI studies,  
379 atypical activation of L-FPN is observed during cognitive flexibility tasks in ASD brains<sup>46</sup>.  
380 Thus, it would be of interest in the future to investigate whether abnormal interaction between  
381 nodes of a mouse L-FPN equivalent in *15 dup* mice is implicated in impaired behavioral  
382 flexibility observed in reversed learning tests of the Morris water maze and Barnes maze<sup>18</sup>.

383

## 384 **Future outlook**

385 Our machine learning classification results demonstrate that information regarding an animal's  
386 ongoing behavioral state is represented in the fast dynamics of global cortical FC patterns  
387 (Figure 5). Identification of brain activity-based ASD biomarkers and machine learning-  
388 assisted diagnosis of ASD using neuroimaging data are fields of active investigation<sup>8,9,47</sup>.  
389 While recent human fMRI studies have begun to explore the use of dynamic resting-state FC  
390 to identify atypical brain network activity unique to ASD<sup>46,47</sup>, our results highlight the  
391 importance of examining behavioral transitions rather than simply looking at the resting state  
392 (Figures 7C–7F). Exploring additional mouse models will accumulate more evidence to

393 identify common FC changes beyond heterogeneity of ASD <sup>48</sup>. Furthermore, in future studies,  
394 it is of great interest to investigate whether the observed FC abnormalities can be reversed by  
395 pharmacologic treatment during postnatal development or adulthood of ASD model mice. Thus,  
396 our system to examine locomotion-dependent rapid FC changes based on mesoscopic cortex-  
397 wide Ca<sup>2+</sup> imaging and VR offers a new translational approach toward developing precise  
398 diagnostic tools and effective treatment for various brain disorders. A fascinating future  
399 possibility would be to create a multimodal “metaverse” in which mice interact with other  
400 conspecifics via their avatars to understand cortical FC dynamics during virtual social  
401 interaction <sup>49</sup>.

## 402 **STAR Methods**

### 403 **Mice**

404 The following Cre driver, reporter, and ASD model mouse lines were used for breeding; Emx1-  
405 cre (B6.129P2-Emx1<tm1.1(cre)Ito>/ItoRbrc, RBRC01345, RIKEN Bioresource Center; <sup>50</sup>),  
406 Ai95D (B6;129S-Gt(ROSA)26Sortm95.1(CAG-GCaMP6f)Hze/J, JAX024105, Jackson  
407 Laboratories), *15q dup* (B6.129S7-Dp(7Herc2-Mkcn3)1Taku, RBRC05954, RIKEN  
408 Bioresource Center; <sup>18</sup>). Although some genotypes of transgenic mice that express GCaMP6  
409 reportedly exhibit cortical epileptiform fluorescence events (most often seen in Ai93 line) <sup>51</sup>,  
410 we did not observe such aberrant activity in our combination of Emx1-cre mice and Ai95D  
411 mice. For experiments, Emx1G6 mice were obtained by crossing Emx1-cre mice with Ai95D  
412 mice. Emx1G6<sub>15q dup</sub> mice were obtained by crossing male mice double-positive for Emx1-Cre  
413 and *15q dup* and female mice positive for Ai95D. All mice were maintained in a reverse 12 h  
414 dark/light cycle (light off at 8 a.m.), and experiments were conducted during the dark phase.  
415 Food and water were available *ad libitum*.

416

### 417 **Surgery**

418 All procedures were carried out following the institutional guidelines and protocols approved  
419 by the RIKEN Animal Experiments Committee. Twenty-three Emx1G6 mice, nine Emx1G6<sub>15q</sub>  
420 <sub>dup</sub> mice, and three C57BL/6J (non-G6) mice (all male at 12–20 weeks old) were used for  
421 experiments. During surgery, mice were anesthetized under 1.5–2.0 % isoflurane in air, and the  
422 body temperature was kept at 37°C using a heating pad. The scalp was cut off and the surface  
423 of the skull was cleaned using a cotton swab. The skull surface was then covered with a thin  
424 layer of transparent resin (Super-Bond C&B, Sun Medical, Japan), followed by placement of  
425 a coverslip (0.17 mm thickness, Matsunami, Japan) onto the resin layer <sup>52</sup>. A custom-made  
426 metal head plate with a polygonal imaging window (size of opening, 13 mm long and 10 mm  
427 wide, Narishige, Japan) was affixed to the edge of the coverslip with dental cement so that the  
428 entire dorsal cortex was clearly visible transcranially through the window (Figures 1C and 1G).  
429 The mice were allowed to fully recover from anesthesia in a warmed chamber and then returned  
430 to their home cages.

431

### 432 **VR environment**

433 A VR environment for head-fixed mice was constructed as previously described with  
434 modification (Figures 1A and 1B) <sup>16,17</sup>. An air-floated spherical treadmill was composed of a  
435 20-cm polystyrene foam ball and a hemispherical stainless steel bowl with an internal diameter  
436 that fitted with the ball. The bowl had eight holes for pressured air at the bottom. The head of  
437 the mouse was fixed to a rigid head mount bar and posts via the head plate and positioned ~1  
438 cm above the top of the ball. The movement of mice was detected as rotations of the treadmill  
439 by two USB optical motion detectors (Gaming Mouse G302, Logicool) which were positioned  
440 orthogonal to each other on the equator of the treadmill. The movement signals from the motion  
441 detectors were transformed into analog output voltages using a custom-written LabVIEW  
442 program (National Instruments) to control the mouse's virtual position via a joystick controller  
443 (USB Joystick Interface, 909991, APEM) connected to the VR software (OmegaSpace ver 3.7,  
444 Solidray). An interactive VR landscape rendered from a first-person perspective was projected  
445 by two compact liquid crystal display projectors (M110, Dell) onto the back of a custom-made  
446 40 cm-diameter translucent acrylic semi-domal screen that was positioned 20 cm in front of  
447 the mouse and covered 240° of the mouse's visual field.

448

#### 449 **Behavioral testing and mesoscopic cortical-wide Ca<sup>2+</sup> imaging**

450 Mice underwent three pre-training steps to acclimate to the test environment. In the first step  
451 that began 3–5 days before surgery, mice were daily allowed to move freely on the top of the  
452 polystyrene foam ball that was rotated manually by an experimenter for 10 min and then  
453 handled by the experimenter under room light for another 10 min. The second step started as  
454 early as a day after surgery. In this step, mice were acclimated daily to head-fixation in the VR  
455 set-up for 3–5 days until they were able to sit and move on the treadmill in a balanced manner  
456 for 0.5–1 h under dim light (approximately 20 lux). In the final step, mice were acclimated to  
457 a complete VR environment and allowed to explore the virtual arena for 10 min daily for 5–10  
458 days until they could move along the wall of the arena and turn the corner without difficulty.

459 After completing these pre-training processes, spontaneous locomotion within the  
460 virtual arena and cortical activity were recorded in a 10-min test session daily for a total of 15  
461 sessions. The cortex was illuminated transcranially by a mercury lamp (U-HGLGPS, Olympus)  
462 through 460-480 nm (MGFPHQ, Olympus) or 457-487 nm (GFP-3035D, Semrock) excitation  
463 filters. Green fluorescence images were acquired using a CMOS camera (ORCA-Flash 4.0 v2,  
464 Hamamatsu) mounted on a HyperScope upright microscope (Scientifica) through a 2×



465 objective lens (Plan Apo  $\lambda$ , NA: 0.10, Nikon) and 495-540 nm (Olympus) or 502.5-537.5 nm  
466 (Semrock) emission filters. Images of  $512 \times 512$  pixels ( $14.8 \mu\text{m} \times 14.8 \mu\text{m}/\text{pixel}$ ; field of view,  
467  $7.5 \text{ mm} \times 7.5 \text{ mm}$ ) were collected at a rate of 30 frames per second while the head-fixed mouse  
468 freely explored the virtual arena. The mouse's locomotion speed and coordinates were recorded  
469 at a sampling rate of 60 Hz using custom LabVIEW software. The rising edge of the TTL  
470 (Transistor-transistor-logic) signals that the camera generated at the acquisition of each frame  
471 were detected and recorded simultaneously with the behavioral data for synchronization with  
472 the imaging data. Experiments without projection of VR landscape were conducted (5 sessions  
473 after final sessions in the normal condition) by turning off the LCD projectors.

474

### 475 **ROI selection**

476 A total of 50 ROIs were defined bilaterally (25 ROIs for each hemisphere) so that they covered  
477 all the cortical subregions designated in a dorsal cortical map<sup>53,54</sup> (Figure 1G). During our  
478 preliminary analysis, we visually inspected sample fluorescence movies of spontaneous  
479 cortical activity from three mice and selected several tens of ROI candidates that appeared  
480 brighter or darker than their surrounding regions. We then carefully examined and modified  
481 them so that the entire ROI set accords well with known cortical parcellations provided by  
482 annotated brain atlases<sup>53,54</sup>. The resultant ROI map was registered with fluorescence images  
483 of the dorsal cortex by manual translation and rotation so that Bregma and the midline of the  
484 ROI map and fluorescence images were in the register. Each ROI was defined as a square of 5  
485  $\times$  5 pixels (within  $128 \times 128$  pixel images) to avoid potential signal contamination across areal  
486 borders. In some cases, multiple ROIs assigned to relatively large cortical areas (e.g., primary  
487 somatosensory cortex, visual cortex, etc.) were arranged so that each corresponded to  
488 anatomical/functional subdivisions designated in the brain atlases.

489 The validity of our ROI positions for the primary somatosensory and primary visual  
490 cortices was confirmed by mapping sensory responses (Figure S1A). An air-puff (20 psi, 200  
491 ms duration, PLI-10, Warner Instruments) to the right whiskers, forelimb, hindlimb, or the right  
492 side of the trunk and a flash of a yellow LED (0.2 Hz, 5 ms duration, Spectralynx, Neuralynx)  
493 to the right eye were given to mice anesthetized with 1.0–1.2 % isoflurane as tactile and visual  
494 stimuli, respectively, and the areas that displayed the largest average fluorescence changes  
495 calculated from 25–30 responses were compared to the corresponding ROIs. The validity of  
496 ROI positions for motor areas was confirmed by constructing a pixel-based correlation map

497 between fluorescence changes of the pixel and locomotor activity (Figures S1B and S1C). The  
498 consistency of ROI registration processes within and across genotypes was validated by  
499 consistent positions of multiple ROIs that corresponded to the primary somatosensory subareas  
500 ( $n = 9\text{--}11$  Emx1G6 mice and  $4\text{--}5$  Emx1G6<sub>15q dup</sub> mice; Figure S7).

501

## 502 **Data analysis**

503 For locomotion analysis, the locomotion speed recorded at 60 Hz was downsampled to 30 Hz  
504 to match the timing of image acquisition. Periods of locomotion were defined as those during  
505 which the locomotion speed exceeded 0.5 cm/s, and the other periods were defined as those of  
506 rest. Episodes of locomotion and rest that were equal to or longer than 3 s were then labeled as  
507 “long locomotion” and “long rest”, respectively. The remaining episodes were categorized as  
508 “short locomotion” and “short rest”. The threshold of 3 s was close to the average lengths of  
509 all locomotion and rest episodes (locomotion,  $3.7 \pm 7.3$  s; rest,  $2.6 \pm 6.4$  s; mean  $\pm$  SD,  $n = 89$   
510 sessions) and was chosen to obtain a sufficient number of transition events per session  
511 (locomotion onset,  $6.4 \pm 3.9$  events/session; locomotion cessation,  $7.3 \pm 4.7$  events/session;  
512 mean  $\pm$  SD,  $n = 89$  sessions) while excluding periods of frequent alterations of the behavioral  
513 state that were too short to be used for the subsequent analysis of functional connectivity (FC)  
514 (Figure 1E). The exclusion of these periods did not likely affect the comparisons between  
515 Emx1G6 mice and Emx1G6<sub>15q dup</sub> mice, as stereotypy measured in an open-field test<sup>55</sup>, and  
516 the percentages of time spent on short locomotion and short rest were comparable between  
517 these genotypes (Figure 6C).

518 Raw fluorescence movies were spatially binned to  $128 \times 128$  pixels and registered  
519 manually using ImageJ (NIH) so that the cortical image was aligned to a representative  
520 overhead view of the dorsal cortex<sup>53</sup>. Subsequent analyses were conducted using custom  
521 software written in MATLAB (Mathworks). Fluorescent intensities of the pixels within an ROI  
522 were averaged to represent the signal of the ROI, denoted  $F$ , and this value was divided by the  
523 baseline signal value  $F_0$ , which was calculated as an average of  $F$  across all frames, to obtain  
524 normalized fluorescence changes  $dF/F = (F - F_0)/F_0$ .

525 The extent of fluorescence signals derived from intrinsic sources (flavin fluorescence  
526 and hemodynamics<sup>56–58</sup>) was estimated via the following two control experiments: imaging  
527 non-GCaMP6-expressing C57BL/6 (non-G6) mice (Figure S2) and correction of  
528 hemodynamic signals using two-wavelength imaging (Figure S5). In the former approach,

529 basal fluorescence images of the dorsal cortical surface were acquired from non-G6 mice in  
530 order to estimate a potential upper bound of signal contamination. The average baseline signal  
531 intensity of non-G6 mice across three representative ROIs (M2a, HLP, and V1a) was  $41.1 \pm$   
532  $0.9$  % of that in Emx1G6 mice (Figure S2B, mean  $\pm$  SEM,  $n = 7$  Emx1G6 mice and 3 non-G6  
533 mice). Furthermore, the average fluorescence changes of non-G6 mice across all hemispheric  
534 ROIs after locomotion onset was  $19.4 \pm 2.2$  % of Emx1G6 mice (mean  $\pm$  SEM, Figures S2C  
535 and S2D). These results imply that intrinsic fluorescence signals are much weaker and less  
536 dynamic than GCaMP fluorescence and that they constitute at most  $\sim 8$  % of signal changes  
537 observed in Emx1G6 mice. These observations are consistent with other recent studies<sup>59,60</sup> that  
538 were conducted without compensation of endogenous signals.

539 In the latter approach, we imaged  $\text{Ca}^{2+}$ -dependent and -independent fluorescence  
540 signals at 470 and 405 nm wavelengths, respectively, in a separate cohort of Emx1G6 mice ( $n$   
541  $= 6$ ), by following the previously described procedure<sup>61</sup>. Images of fluorescence excited at 470  
542 and 405 nm were captured alternately at an overall frame rate of 40 frames per second (20  
543 frames per second for each wavelength) using two LED drivers (470 nm, SOLIS-470C and  
544 DC20; 405 nm, M405L4 and LEDD1B, Thorlabs) controlled by custom LabVIEW software.  
545 A hemodynamic correction was conducted by subtracting  $dF/F_{405 \text{ nm}}$  from  $dF/F_{470 \text{ nm}}$ , where  
546  $dF/F_{405 \text{ nm}}$  and  $dF/F_{470 \text{ nm}}$  are normalized fluorescence changes for signals obtained at 405 and  
547 470 nm, respectively (Figure S5A; <sup>62</sup>). The results demonstrate that although correlation  
548 coefficients between ROIs appeared slightly higher and thus resulted in identifying a larger  
549 number of highly correlated FCs (Figure S5B, see also Figure 2B), overall patterns of the  
550 network properties (node degree, betweenness centrality, CPL, and modularity  $Q$ , see below  
551 for details of these parameters) were qualitatively similar to those obtained without  
552 hemodynamic correction (Figures S5C–S5F, see also Figures 2C–2F; <sup>34</sup>).

553 In this study, we focused on analyses of the dynamics of functional cortical networks  
554 during transitions between locomotion and rest. We considered only transitions from long rest  
555 to long locomotion (locomotion onset) and those from long locomotion to long rest  
556 (locomotion cessation). As a control, we randomly selected reference time points regardless of  
557 the behavioral state as many times as an average number of locomotion onset and locomotion  
558 cessation (random control). Sessions with at least two onset or two cessation events were  
559 included for analysis, and average fluorescence changes across all onset, cessation, or random  
560 events were calculated to obtain values representative of each session. The numbers of each  
561 type of transitions (onset, cessation, and random, respectively) analyzed are as follow:

562 Emx1G6, 569, 653, and 659 events,  $n = 89$  sessions from 7 mice; no projection, 382, 454, and  
563 451 events,  $n = 71$  sessions from 17 mice; hemodynamics correction, 658, 616, and 656 events,  
564  $n = 71$  sessions from 6 mice; Emx1G6<sub>15q dup</sub>, 275, 296, and 331 events,  $n = 88$  sessions from 9  
565 mice; Non-G6, 513, 621 and 590 events,  $n = 41$  sessions from 3 mice.

566 To analyze functional connectivity (FC) between ROIs, we created correlation  
567 matrices representing the correlation between the cortical activity of all ROI pairs. We  
568 extracted 6-s segments of  $dF/F$  that spanned  $-3$  s to  $+3$  s around the event of interest (i.e., onset,  
569 cessation, or random). Each of the 6-s segments was then further divided into 6 non-  
570 overlapping 1-s subsegments, and FC was calculated as pair-wise Pearson correlation  
571 coefficients between  $dF/F$  during these 1-s subsegments. The 1-s time window was chosen to  
572 investigate rapid and dynamic changes of FC associated with behavior and accords with the  
573 recent notion that spontaneous behavior and ongoing brain activity are related to each other at  
574 a time scale of about 1 s<sup>63</sup>. The correlation matrices obtained were averaged within a session  
575 and visualized as functional connectivity graphs of binarized networks using available  
576 MATLAB codes<sup>64</sup>, in which the positions of ROIs were arranged according to their anatomical  
577 positions, and lines and symbol sizes represented highly correlated FC ( $r > 0.8$ ) and the number  
578 of such connections associated with the ROI, respectively. The threshold for binarization ( $r >$   
579  $0.8$ ) selected top  $26.7 \pm 10.1$  % of the most prominent connections out of all 1,225 connections  
580 between 50 ROIs (mean  $\pm$  SD,  $n = 1,602$  subsegments from 89 sessions times 3 conditions;  
581 average correlation coefficient, onset,  $0.68 \pm 0.03$ ; cessation,  $0.68 \pm 0.01$ ; random,  $0.68 \pm 0.01$ ;  
582 mean  $\pm$  SD,  $n = 534$  subsegments from 89 sessions). Node degree, betweenness centrality,  
583 characteristic path length (CPL), and modularity Q were calculated using the Brain  
584 Connectivity Toolbox<sup>21</sup>. Node degree and betweenness centrality represent the number of  
585 functional connections associated with each cortical ROI and the extent to which the ROI falls  
586 on the shortest paths between any other pairs of ROIs in the network, respectively. CPL  
587 represents the average shortest path length between all ROI pairs in the network. Modularity  
588 Q represents an index of optimized modules that maximize the number of within-module edges  
589 and minimize the number of between-module edges.

590

### 591 **Support vector machine classification**

592 Support vector machine (SVM) classification was performed using the Statistics and Machine  
593 Learning Toolbox in MATLAB. For behavior state classification, we used the “fitlinear”

594 function to train a linear classification model with high-dimensional predictor data. The SVM  
595 was regularized by the lasso method to reduce model complexity and prevent overfitting. The  
596 FC datasets included 17,970-time point data that spanned the entire 10-min sessions. Each time  
597 point data contained 1,225 FCs from 50 ROIs as features. The FCs were calculated using a 1-  
598 frame sliding window of 30-frame size without excluding short locomotion and short rest  
599 periods. The corresponding behavioral data were binary vectors in which rest and locomotion  
600 were labeled as 0 and 1, respectively. Data that contained at least two episodes of long  
601 locomotion or long rest within a session were used. All relevant data (11–15 sessions per  
602 mouse) from each mouse were concatenated to be used for training and testing. An SVM  
603 classifier was trained using datasets from four of all seven mice (train set), and binary  
604 classification was conducted on each time point of the FC data from the remaining three mice  
605 (test set). All 35 combinations arising from seven mice ( ${}^7C_4$ ) were tested. Accuracy was  
606 calculated as a percentage of time points that were classified to the right behavioral state. The  
607 chance level was defined as the overall average percentage of short and long locomotion  
608 periods (58 %) since SVM tends to classify data to the more frequent category. In control, the  
609 datasets used for training were also used for testing (“train” control). In shuffled control,  
610 elements of behavioral state vectors were randomly shuffled and used for training and testing.

611 To identify features that contributed to the classification, we sorted features of the  
612 trained classifiers by their weights that represented coefficients of normal vector on the  
613 hyperplane. We then counted the appearance of features that included each ROI in the top 0.5 %  
614 and bottom 0.5 % distributions (6 features each, 12 total) as an importance index for the ROI.  
615 When cortical areas of interest contained multiple ROIs, this index was normalized by their  
616 number. The change level was defined as an average of 100 times random sampling. We then  
617 newly trained SVM classifiers using these top 0.5 % and bottom 0.5 % features and classified  
618 the test datasets to confirm that the selected features contribute to the classification. As a  
619 control, we tested classifiers trained with the same number of randomly selected features. This  
620 was repeated 100 times, and the results were averaged.

621 For genotype classification, we used the “fitsvm” function in MATLAB, which trains  
622 and cross-validates an SVM model to solve problems with low-dimensional predictors. The  
623 1,225 correlation coefficients were averaged throughout a session at each time point within  
624 relevant behavioral states or transitions. The data were then concatenated together for all  
625 relevant sessions, and the correlation coefficients were normalized into z-scores. We then cross-  
626 validated the classifiers using the leave-one-subject-out (LOSO) method, in which a pair of

627 datasets from a mouse per each genotype were excluded from training and used for testing. In  
628 training, the classifiers were subjected to 10-fold cross-validation. All 63 combinations were  
629 tested from nine *Emx1G6<sup>15q dup</sup>* mice and seven *Emx1G6* mice.

630

### 631 **Histology**

632 Mice were deeply anesthetized with isoflurane and perfused transcardially with phosphate-  
633 buffered saline (PBS) followed by 4 % paraformaldehyde (PFA) in PBS. Brains were removed  
634 and further fixed in 4 % PFA in PBS at 4°C overnight. Frozen parasagittal sections were cut  
635 on a cryostat to a thickness of 30 µm. The sections were incubated at 4°C overnight with rabbit  
636 anti-GFP antibody (1:1000, A-11122, Thermo Fisher) and mouse anti-GAD67 antibody  
637 (1:1000 clone 1G10.2, Millipore) diluted in PBS containing 5 % normal goat serum and 0.3 %  
638 Triton X-100, followed by Alexa Fluor 488- or Alexa 568-labeled goat anti-rabbit or anti-  
639 mouse IgG antibody (1:500, A-11034 or A-11019, ThermoFisher) diluted in the same buffer  
640 at room temperature for 1 h. Cell nuclei were counterstained using VectaShield Mounting  
641 Medium with DAPI (Vector Laboratories). Fluorescence images were acquired using a  
642 Keyence BZ-9000 epifluorescence microscope equipped with a 4× or 10× objective.

643

### 644 **Statistics**

645 To statistically test functional network connectivity, we used Network Based Statistic (NBS)  
646 Toolbox in MATLAB<sup>23</sup>. NBS nonparametrically calculates familywise error rate-corrected *P*-  
647 values with 5,000 times permutation testing. Inter-areal activity in test conditions was  
648 considered significantly correlated or decorrelated if the correlation coefficient during the  
649 behavioral transitions was higher or lower than random control with  $P < 0.01$ . In comparison  
650 between *Emx1G6* mice and *Emx1G6<sup>15q dup</sup>* mice, the differences were considered significant  
651 when  $P < 0.05$ . Other statistical tests were performed using MATLAB or R. For two-group  
652 comparisons, Welch's t-test was used when normal distributions were assumed. Otherwise,  
653 Wilcoxon rank-sum test was used. For comparisons between more than two groups, Wilcoxon  
654 rank-sum test with Bonferroni correction, one-way ANOVA and two-way ANOVA with Tukey-  
655 Kramer test were used.

## 656 **References**

- 657 1. Ferezou, I., Haiss, F., Gentet, L.J., Aronoff, R., Weber, B., and Petersen, C.C.H. (2007).  
658 Spatiotemporal Dynamics of Cortical Sensorimotor Integration in Behaving Mice. *Neuron* 56,  
659 907–923. 10.1016/j.neuron.2007.10.007.
- 660 2. van den Heuvel, M.P., and Hulshoff Pol, H.E. (2010). Exploring the brain network: a  
661 review on resting-state fMRI functional connectivity. *Eur Neuropsychopharmacol* 20, 519–534.  
662 10.1016/j.euroneuro.2010.03.008.
- 663 3. Honey, C.J., Kötter, R., Breakspear, M., and Sporns, O. (2007). Network structure of  
664 cerebral cortex shapes functional connectivity on multiple time scales. *Proc Natl Acad Sci U S*  
665 *A* 104, 10240–10245. 10.1073/pnas.0701519104.
- 666 4. Gozzi, A., and Schwarz, A.J. (2016). Large-scale functional connectivity networks in  
667 the rodent brain. *Neuroimage* 127, 496–509. 10.1016/j.neuroimage.2015.12.017.
- 668 5. Tsurugizawa, T., Tamada, K., Ono, N., Karakawa, S., Kodama, Y., Debacker, C., Hata,  
669 J., Okano, H., Kitamura, A., Zalesky, A., et al. (2020). Awake functional MRI detects neural  
670 circuit dysfunction in a mouse model of autism. *Sci Adv* 6, eaav4520. 10.1126/sciadv.aav4520.
- 671 6. Minshew, N.J., and Keller, T.A. (2010). “The Nature of Brain Dysfunction in Autism:  
672 Functional Brain Imaging Studies.” *Curr Opin Neurol* 23, 124–130.  
673 10.1097/WCO.0b013e32833782d4.
- 674 7. Hull, J.V., Dokovna, L.B., Jacokes, Z.J., Torgerson, C.M., Irimia, A., and Van Horn,  
675 J.D. (2017). Resting-State Functional Connectivity in Autism Spectrum Disorders: A Review.  
676 *Front Psychiatry* 7, 205. 10.3389/fpsy.2016.00205.
- 677 8. Eslami, T., Almuqhim, F., Raiker, J.S., and Saeed, F. (2020). Machine Learning  
678 Methods for Diagnosing Autism Spectrum Disorder and Attention- Deficit/Hyperactivity  
679 Disorder Using Functional and Structural MRI: A Survey. *Front Neuroinform* 14, 575999.  
680 10.3389/fninf.2020.575999.
- 681 9. Uddin, L.Q., Dajani, D.R., Voorhies, W., Bednarz, H., and Kana, R.K. (2017).  
682 Progress and roadblocks in the search for brain-based biomarkers of autism and attention-  
683 deficit/hyperactivity disorder. *Transl Psychiatry* 7, e1218. 10.1038/tp.2017.164.
- 684 10. Fournier, K.A., Hass, C.J., Naik, S.K., Lodha, N., and Cauraugh, J.H. (2010). Motor  
685 coordination in autism spectrum disorders: a synthesis and meta-analysis. *J Autism Dev Disord*  
686 40, 1227–1240. 10.1007/s10803-010-0981-3.

- 687 11. Longuet, S., Ferrel-Chapus, C., Orève, M.-J., Chamot, J.-M., and Vernazza-Martin, S.  
688 (2012). Emotion, Intent and Voluntary Movement in Children with Autism. An Example: The  
689 Goal Directed Locomotion. *J Autism Dev Disord* 42, 1446–1458. 10.1007/s10803-011-1383-  
690 x.
- 691 12. Vernazza-Martin, S., Martin, N., Vernazza, A., Lepellec-Muller, A., Rufo, M.,  
692 Massion, J., and Assaiante, C. (2005). Goal directed locomotion and balance control in autistic  
693 children. *J Autism Dev Disord* 35, 91–102. 10.1007/s10803-004-1037-3.
- 694 13. Hannant, P., Tavassoli, T., and Cassidy, S. (2016). The Role of Sensorimotor  
695 Difficulties in Autism Spectrum Conditions. *Front Neurol* 7, 124. 10.3389/fneur.2016.00124.
- 696 14. Cardin, J.A., Crair, M.C., and Higley, M.J. (2020). Mesoscopic Imaging: Shining a  
697 Wide Light on Large-Scale Neural Dynamics. *Neuron* 108, 33–43.  
698 10.1016/j.neuron.2020.09.031.
- 699 15. Ren, C., and Komiyama, T. (2021). Characterizing Cortex-Wide Dynamics with  
700 Wide-Field Calcium Imaging. *J. Neurosci.* 41, 4160–4168. 10.1523/JNEUROSCI.3003-  
701 20.2021.
- 702 16. Sato, M., Kawano, M., Mizuta, K., Islam, T., Lee, M.G., and Hayashi, Y. (2017).  
703 Hippocampus-Dependent Goal Localization by Head-Fixed Mice in Virtual Reality. *eNeuro* 4.  
704 10.1523/ENEURO.0369-16.2017.
- 705 17. Sato, M., Mizuta, K., Islam, T., Kawano, M., Sekine, Y., Takekawa, T., Gomez-  
706 Dominguez, D., Schmidt, A., Wolf, F., Kim, K., et al. (2020). Distinct Mechanisms of Over-  
707 Representation of Landmarks and Rewards in the Hippocampus. *Cell Rep* 32, 107864.  
708 10.1016/j.celrep.2020.107864.
- 709 18. Nakatani, J., Tamada, K., Hatanaka, F., Ise, S., Ohta, H., Inoue, K., Tomonaga, S.,  
710 Watanabe, Y., Chung, Y.J., Banerjee, R., et al. (2009). Abnormal behavior in a chromosome-  
711 engineered mouse model for human 15q11-13 duplication seen in autism. *Cell* 137, 1235–1246.  
712 10.1016/j.cell.2009.04.024.
- 713 19. Tamada, K., Fukumoto, K., Toya, T., Nakai, N., Awasthi, J.R., Tanaka, S., Okabe, S.,  
714 Spitz, F., Saitow, F., Suzuki, H., et al. (2021). Genetic dissection identifies Necdin as a driver  
715 gene in a mouse model of paternal 15q duplications. *Nat Commun* 12, 4056. 10.1038/s41467-  
716 021-24359-3.
- 717 20. Nakai, N., Nagano, M., Saitow, F., Watanabe, Y., Kawamura, Y., Kawamoto, A.,  
718 Tamada, K., Mizuma, H., Onoe, H., Watanabe, Y., et al. (2017). Serotonin rebalances cortical  
719 tuning and behavior linked to autism symptoms in 15q11-13 CNV mice. *Sci Adv* 3, e1603001.



720 10.1126/sciadv.1603001.

721 21. Rubinov, M., and Sporns, O. (2010). Complex network measures of brain  
722 connectivity: uses and interpretations. *Neuroimage* 52, 1059–1069.  
723 10.1016/j.neuroimage.2009.10.003.

724 22. Harris, K.D., and Thiele, A. (2011). Cortical state and attention. *Nat Rev Neurosci* 12,  
725 509–523. 10.1038/nrn3084.

726 23. Zalesky, A., Fornito, A., and Bullmore, E.T. (2010). Network-based statistic:  
727 identifying differences in brain networks. *Neuroimage* 53, 1197–1207.  
728 10.1016/j.neuroimage.2010.06.041.

729 24. Damoiseaux, J.S., and Greicius, M.D. (2009). Greater than the sum of its parts: a  
730 review of studies combining structural connectivity and resting-state functional connectivity.  
731 *Brain Struct Funct* 213, 525–533. 10.1007/s00429-009-0208-6.

732 25. Koch, M.A., Norris, D.G., and Hund-Georgiadis, M. (2002). An investigation of  
733 functional and anatomical connectivity using magnetic resonance imaging. *Neuroimage* 16,  
734 241–250. 10.1006/nimg.2001.1052.

735 26. Mohajerani, M.H., Chan, A.W., Mohsenvand, M., LeDue, J., Liu, R., McVea, D.A.,  
736 Boyd, J.D., Wang, Y.T., Reimers, M., and Murphy, T.H. (2013). Spontaneous cortical activity  
737 alternates between motifs defined by regional axonal projections. *Nat Neurosci* 16, 1426–1435.  
738 10.1038/nn.3499.

739 27. Clancy, K.B., Orsolich, I., and Mrcic-Flogel, T.D. (2019). Locomotion-dependent  
740 remapping of distributed cortical networks. *Nat. Neurosci.* 22, 778–786. 10.1038/s41593-019-  
741 0357-8.

742 28. Nir, Y., Mukamel, R., Dinstein, I., Privman, E., Harel, M., Fisch, L., Gelbard-Sagiv,  
743 H., Kipervasser, S., Andelman, F., Neufeld, M.Y., et al. (2008). Interhemispheric correlations  
744 of slow spontaneous neuronal fluctuations revealed in human sensory cortex. *Nat Neurosci* 11,  
745 1100–1108. 10.1038/nn.2177.

746 29. Shmuel, A., and Leopold, D.A. (2008). Neuronal correlates of spontaneous  
747 fluctuations in fMRI signals in monkey visual cortex: Implications for functional connectivity  
748 at rest. *Hum Brain Mapp* 29, 751–761. 10.1002/hbm.20580.

749 30. Allen, W.E., Kauvar, I.V., Chen, M.Z., Richman, E.B., Yang, S.J., Chan, K., Gradinaru,  
750 V., Deverman, B.E., Luo, L., and Deisseroth, K. (2017). Global Representations of Goal-  
751 Directed Behavior in Distinct Cell Types of Mouse Neocortex. *Neuron* 94, 891-907.e6.

752 10.1016/j.neuron.2017.04.017.

753 31. Keller, G.B., Bonhoeffer, T., and Hübener, M. (2012). Sensorimotor Mismatch Signals  
754 in Primary Visual Cortex of the Behaving Mouse. *Neuron* 74, 809–815.  
755 10.1016/j.neuron.2012.03.040.

756 32. Leinweber, M., Ward, D.R., Sobczak, J.M., Attinger, A., and Keller, G.B. (2017). A  
757 Sensorimotor Circuit in Mouse Cortex for Visual Flow Predictions. *Neuron* 95, 1420-1432.e5.  
758 10.1016/j.neuron.2017.08.036.

759 33. Makino, H., Ren, C., Liu, H., Kim, A.N., Kondapaneni, N., Liu, X., Kuzum, D., and  
760 Komiyama, T. (2017). Transformation of Cortex-wide Emergent Properties during Motor  
761 Learning. *Neuron* 94, 880-890.e8. 10.1016/j.neuron.2017.04.015.

762 34. West, S.L., Aronson, J.D., Popa, L.S., Feller, K.D., Carter, R.E., Chiesl, W.M., Gerhart,  
763 M.L., Shekhar, A.C., Ghanbari, L., Kodandaramaiah, S.B., et al. (2021). Wide-Field Calcium  
764 Imaging of Dynamic Cortical Networks during Locomotion. *Cereb Cortex*, bhab373.

765 35. Zingg, B., Hintiryan, H., Gou, L., Song, M.Y., Bay, M., Bienkowski, M.S., Foster,  
766 N.N., Yamashita, S., Bowman, I., Toga, A.W., et al. (2014). Neural networks of the mouse  
767 neocortex. *Cell* 156, 1096–1111. 10.1016/j.cell.2014.02.023.

768 36. Barthas, F., and Kwan, A.C. (2017). Secondary Motor Cortex: Where “Sensory”  
769 Meets “Motor” in the Rodent Frontal Cortex. *Trends Neurosci* 40, 181–193.  
770 10.1016/j.tins.2016.11.006.

771 37. Mackay, W.A. (1997). Synchronized neuronal oscillations and their role in motor  
772 processes. *Trends Cogn Sci* 1, 176–183. 10.1016/S1364-6613(97)01059-0.

773 38. Nicolelis, M.A., Baccala, L.A., Lin, R.C., and Chapin, J.K. (1995). Sensorimotor  
774 encoding by synchronous neural ensemble activity at multiple levels of the somatosensory  
775 system. *Science* 268, 1353–1358. 10.1126/science.7761855.

776 39. Karadimas, S.K., Satkunendrarajah, K., Laliberte, A.M., Ringuette, D., Weisspapir, I.,  
777 Li, L., Gosgnach, S., and Fehlings, M.G. (2020). Sensory cortical control of movement. *Nat*  
778 *Neurosci* 23, 75–84. 10.1038/s41593-019-0536-7.

779 40. Wilson, R.B., Elashoff, D., Gouelle, A., Smith, B.A., Wilson, A.M., Dickinson, A.,  
780 Safari, T., Hyde, C., and Jeste, S.S. (2020). Quantitative gait analysis in Duplication 15q  
781 Syndrome and Nonsyndromic ASD. *Autism Res* 13, 1102–1110. 10.1002/aur.2298.

782 41. Veltman, M.W.M., Thompson, R.J., Craig, E.E., Dennis, N.R., Roberts, S.E., Moore,

- 783 V., Brown, J.A., and Bolton, P.F. (2005). A paternally inherited duplication in the Prader-  
784 Willi/Angelman syndrome critical region: a case and family study. *J Autism Dev Disord* 35,  
785 117–127. 10.1007/s10803-004-1039-1.
- 786 42. Piochon, C., Kloth, A.D., Grasselli, G., Titley, H.K., Nakayama, H., Hashimoto, K.,  
787 Wan, V., Simmons, D.H., Eissa, T., Nakatani, J., et al. (2014). Cerebellar plasticity and motor  
788 learning deficits in a copy-number variation mouse model of autism. *Nat Commun* 5, 5586.  
789 10.1038/ncomms6586.
- 790 43. Chabrol, F.P., Blot, A., and Mrcic-Flogel, T.D. (2019). Cerebellar Contribution to  
791 Preparatory Activity in Motor Neocortex. *Neuron* 103, 506-519.e4.  
792 10.1016/j.neuron.2019.05.022.
- 793 44. Gao, Z., Davis, C., Thomas, A.M., Economo, M.N., Abrego, A.M., Svoboda, K., De  
794 Zeeuw, C.I., and Li, N. (2018). A cortico-cerebellar loop for motor planning. *Nature* 563, 113–  
795 116. 10.1038/s41586-018-0633-x.
- 796 45. Uddin, L.Q., Yeo, B.T.T., and Spreng, R.N. (2019). Towards a Universal Taxonomy  
797 of Macro-scale Functional Human Brain Networks. *Brain Topogr* 32, 926–942.  
798 10.1007/s10548-019-00744-6.
- 799 46. Uddin, L.Q. (2021). Brain Mechanisms Supporting Flexible Cognition and Behavior  
800 in Adolescents With Autism Spectrum Disorder. *Biol Psychiatry* 89, 172–183.  
801 10.1016/j.biopsych.2020.05.010.
- 802 47. Du, Y., Fu, Z., and Calhoun, V.D. (2018). Classification and Prediction of Brain  
803 Disorders Using Functional Connectivity: Promising but Challenging. *Front Neurosci* 12, 525.  
804 10.3389/fnins.2018.00525.
- 805 48. Nakai, N., Takumi, T., Nakai, J., and Sato, M. (2018). Common Defects of Spine  
806 Dynamics and Circuit Function in Neurodevelopmental Disorders: A Systematic Review of  
807 Findings From in Vivo Optical Imaging of Mouse Models. *Front Neurosci* 12, 412.  
808 10.3389/fnins.2018.00412.
- 809 49. Kingsbury, L., and Hong, W. (2020). A Multi-Brain Framework for Social Interaction.  
810 *Trends in Neurosciences* 43, 651–666. 10.1016/j.tins.2020.06.008.
- 811 50. Iwasato, T., Nomura, R., Ando, R., Ikeda, T., Tanaka, M., and Itohara, S. (2004).  
812 Dorsal telencephalon-specific expression of Cre recombinase in PAC transgenic mice. *Genesis*  
813 38, 130–138. 10.1002/gene.20009.
- 814 51. Steinmetz, N.A., Buetfering, C., Lecoq, J., Lee, C.R., Peters, A.J., Jacobs, E.A.K.,

- 815 Coen, P., Ollerenshaw, D.R., Valley, M.T., de Vries, S.E.J., et al. (2017). Aberrant Cortical  
816 Activity in Multiple GCaMP6-Expressing Transgenic Mouse Lines. *eNeuro* 4,  
817 ENEURO.0207-17.2017. 10.1523/ENEURO.0207-17.2017.
- 818 52. Cramer, J.V., Gesierich, B., Roth, S., Dichgans, M., Düring, M., and Liesz, A. (2019).  
819 In vivo widefield calcium imaging of the mouse cortex for analysis of network connectivity in  
820 health and brain disease. *Neuroimage* 199, 570–584. 10.1016/j.neuroimage.2019.06.014.
- 821 53. Franklin, K., and Paxinos, G. (2003). *The Mouse Brain in Stereotaxic Coordinates*,  
822 2nd Edition (Academic Press).
- 823 54. Kirkcaldie, M.T.K. (2012). Chapter 4 - Neocortex. In *The Mouse Nervous System*, C.  
824 Watson, G. Paxinos, and L. Puelles, eds. (Academic Press), pp. 52–111. 10.1016/B978-0-12-  
825 369497-3.10004-4.
- 826 55. Tamada, K., Tomonaga, S., Hatanaka, F., Nakai, N., Takao, K., Miyakawa, T.,  
827 Nakatani, J., and Takumi, T. (2010). Decreased Exploratory Activity in a Mouse Model of 15q  
828 Duplication Syndrome; Implications for Disturbance of Serotonin Signaling. *PLoS ONE* 5,  
829 e15126. 10.1371/journal.pone.0015126.
- 830 56. Kozberg, M.G., Ma, Y., Shaik, M.A., Kim, S.H., and Hillman, E.M.C. (2016). Rapid  
831 Postnatal Expansion of Neural Networks Occurs in an Environment of Altered Neurovascular  
832 and Neurometabolic Coupling. *J. Neurosci.* 36, 6704–6717. 10.1523/JNEUROSCI.2363-  
833 15.2016.
- 834 57. Shibuki, K., Hishida, R., Murakami, H., Kudoh, M., Kawaguchi, T., Watanabe, M.,  
835 Watanabe, S., Kouuchi, T., and Tanaka, R. (2003). Dynamic imaging of somatosensory cortical  
836 activity in the rat visualized by flavoprotein autofluorescence. *J. Physiol. (Lond.)* 549, 919–  
837 927. 10.1113/jphysiol.2003.040709.
- 838 58. Wechselblatt, J.B., Flister, E.D., Piscopo, D.M., and Niell, C.M. (2016). Large-scale  
839 imaging of cortical dynamics during sensory perception and behavior. *J Neurophysiol* 115,  
840 2852–2866. 10.1152/jn.01056.2015.
- 841 59. Gallero-Salas, Y., Han, S., Sych, Y., Voigt, F.F., Laurenczy, B., Gilad, A., and  
842 Helmchen, F. (2021). Sensory and Behavioral Components of Neocortical Signal Flow in  
843 Discrimination Tasks with Short-Term Memory. *Neuron* 109, 135-148.e6.  
844 10.1016/j.neuron.2020.10.017.
- 845 60. Gilad, A., and Helmchen, F. (2020). Spatiotemporal refinement of signal flow through  
846 association cortex during learning. *Nat Commun* 11, 1744. 10.1038/s41467-020-15534-z.

- 847 61. Couto, J., Musall, S., Sun, X.R., Khanal, A., Gluf, S., Saxena, S., Kinsella, I., Abe, T.,  
848 Cunningham, J.P., Paninski, L., et al. (2021). Chronic, cortex-wide imaging of specific cell  
849 populations during behavior. *Nat Protoc* 16, 3241–3263. 10.1038/s41596-021-00527-z.
- 850 62. MacDowell, C.J., and Buschman, T.J. (2020). Low-Dimensional Spatiotemporal  
851 Dynamics Underlie Cortex-wide Neural Activity. *Curr Biol* 30, 2665-2680.e8.  
852 10.1016/j.cub.2020.04.090.
- 853 63. Stringer, C., Pachitariu, M., Steinmetz, N., Reddy, C.B., Carandini, M., and Harris,  
854 K.D. (2019). Spontaneous behaviors drive multidimensional, brainwide activity. *Science* 364,  
855 255. 10.1126/science.aav7893.
- 856 64. Lim, D.H., LeDue, J.M., and Murphy, T.H. (2015). Network analysis of mesoscale  
857 optical recordings to assess regional, functional connectivity. *Neurophotonics* 2, 041405.  
858 10.1117/1.NPh.2.4.041405.

859

## 860 **Acknowledgment**

861 We thank Norihiro Sadato, Masaki Fukunaga, and Takahiko Koike for advice on the network  
862 analyses, Yasunori Hayashi for general support and Hiromu Monai for comments on this  
863 manuscript.

864

## 865 **Funding**

866 The KAKENHI from JSPS: 19H04942 (NN), 17H05985 and 19H04942 (MS), and 16H06316,  
867 16H06463, 16H06276, 21H00202, 21H04813 and 21K19351 (TT)

868 The Incentive Research Project grant from RIKEN (NN)

869 Japan Agency for Medical Research and Development (JP21wm0425011) (TT)

870 Japan Science and Technology Agency (JPMJMS2299) (TT)

871 Intramural Research Grant (30-9) for Neurological and Psychiatric Disorders of NCNP (TT)

872 The Takeda Science Foundation, Smoking Research Foundation, Tokyo Biochemical Research  
873 Foundation, Research Foundation for Opto-Science and Technology, Taiju Life Social Welfare  
874 Foundation, The Naito Foundation, and The Tokumori Yasumoto Memorial Trust for  
875 Researches on Tuberous Sclerosis Complex and Related Rare Neurological Diseases (TT)

876

877 **Author contributions**

878 Conceptualization: NN

879 Methodology: NN, MS

880 Investigation: NN, YS, XF

881 Visualization: NN

882 Supervision: OY, MS, JN, TT

883 Writing—original draft: NN

884 Writing—review & editing: MS, AZ, TT

885

886 **Competing interests**

887 The authors have no conflict of interest.

888

889 **Data and materials availability**

890 All data, code, and materials are made available by the authors upon reasonable request.

891

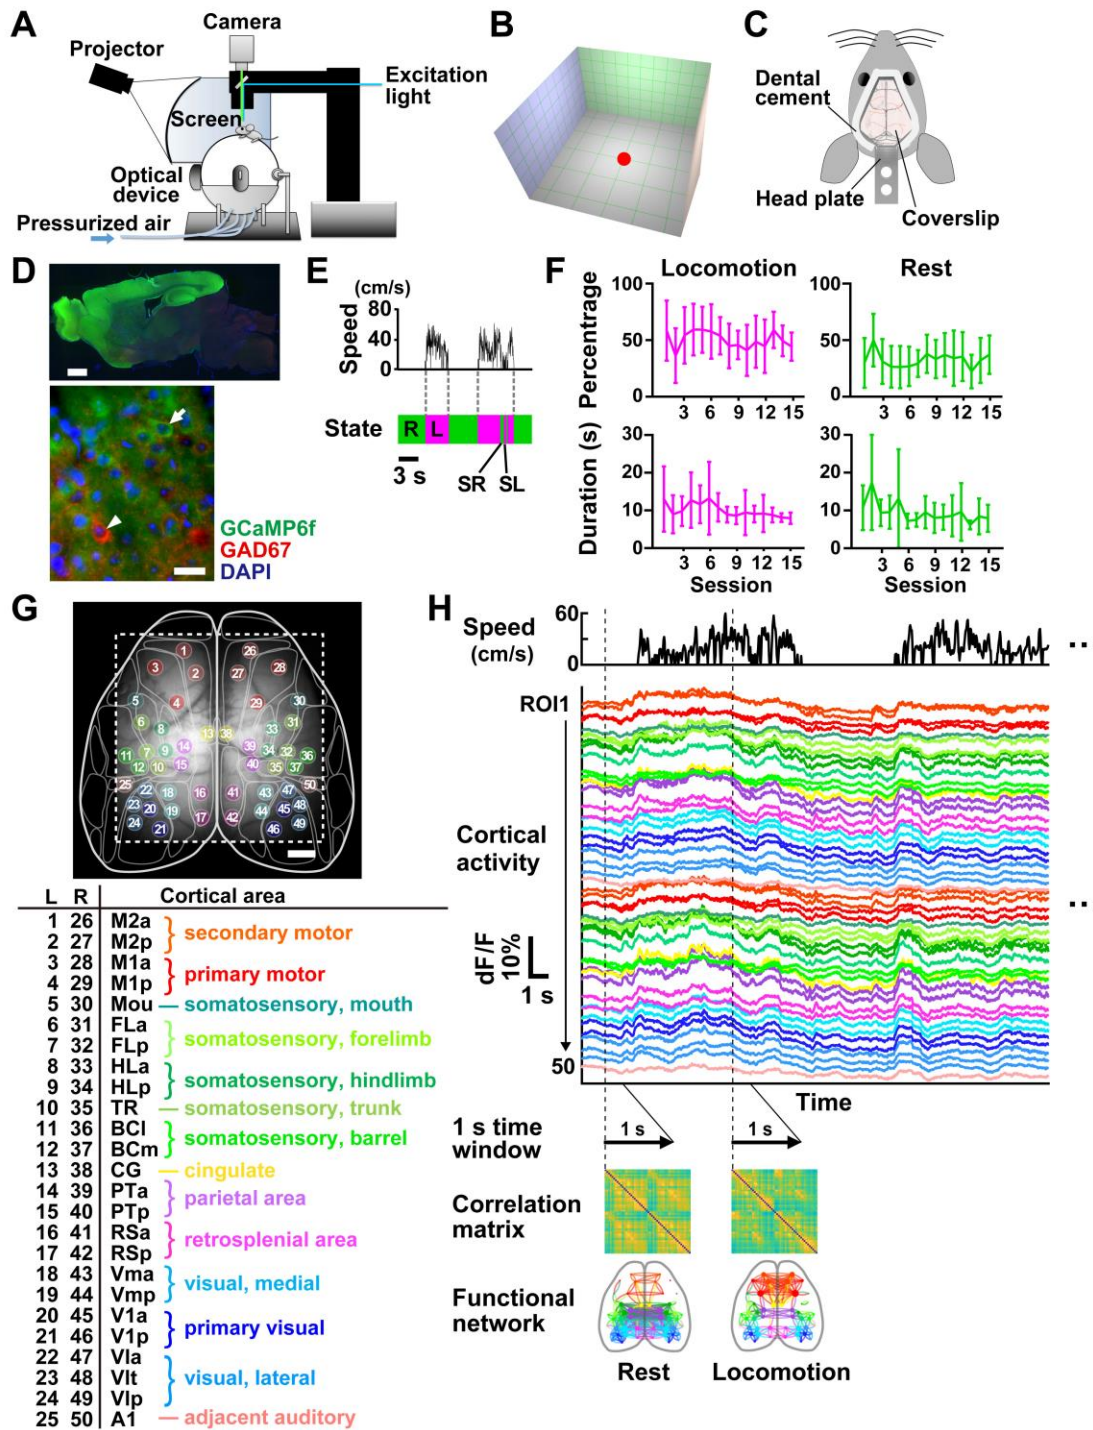

892 **Figure 1. Analysis of cortical functional connectivity with mesoscopic  $\text{Ca}^{2+}$  imaging.**

893 (A) The imaging and virtual reality (VR) system.

894 (B) The virtual arena. The floor and walls have green gridlines to enhance the sense of visual  
895 flow. Each wall is painted in a different color. The mouse starts to move from the location  
896 indicated by the red dot.

897 (C) A schematic of transcranial imaging window affixed to the mouse skull.

898 **(D)** Expression of GCaMP6f in a parasagittal section of an adult Emx1G6 mouse (top, scale  
899 bar = 1 mm). Immunofluorescence detection of GCaMP6f (green) and GAD67 (red) in layer  
900 2/3 of the primary motor cortex (bottom, scale bar = 20  $\mu\text{m}$ ). Cell nuclei were stained with  
901 DAPI (blue). The arrow and arrowhead indicate an example of GCaMP6f-positive and  
902 GAD67-positive cells, respectively.

903 **(E)** Two behavioral states, long locomotion (L) and long rest (R), were defined by spontaneous  
904 locomotion and resting states (duration:  $\geq 3$  s) of head-fixed mice. Locomotion and rest  
905 episodes shorter than 3 s, short locomotion (SL) and short rest (SR) were excluded from  
906 functional connectivity analysis during behavioral transitions.

907 **(F)** Percentages of time spent in long locomotion and long rest (top) and average lengths of  
908 long locomotion and long rest episodes (bottom) across sessions. Data represent mean  $\pm$  SD.  
909 (Percentage) locomotion:  $F_{(14, 74)} = 0.61$ ,  $P = 0.84$ ; rest:  $F_{(14, 74)} = 0.52$ ,  $P = 0.91$ ; (Duration)  
910 locomotion:  $F_{(14, 74)} = 0.63$ ,  $P = 0.83$ ; rest:  $F_{(14, 74)} = 1.83$ ,  $P = 0.58$ ,  $n = 7$  mice, one-way  
911 ANOVA.

912 **(G)** Fifty cortical ROIs are overlaid onto a grayscale image of the dorsal cortex with a cortical  
913 parcellation map (top, dashed lines indicate the field of view, scale bar = 1 mm). ROIs 1–25  
914 and 26–50 were defined in the left (L) and right (R) hemispheres, respectively, and ROIs for  
915 each hemisphere were numbered along the anterior-posterior axis (bottom). The lower case  
916 letters following cortical areas indicate anterior (e.g., M2a) and posterior (e.g., M2p), or lateral  
917 (e.g., BCl) and medial (e.g., BCm) positions.

918 **(H)** Analysis of cortical functional connectivity. After calculating normalized fluorescence  
919 changes ( $dF/F$ ) for each ROI, pair-wise Pearson's correlation coefficients of cortical activity in  
920 a one-second time window were calculated for all ROI pairs and then visualized as matrices.  
921 Each matrix was labeled with a corresponding behavior state at the first frame of the time  
922 window. In graph visualization of functional networks, connectivity with a correlation  
923 coefficient above a threshold ( $r > 0.8$ ) was denoted as a line (edge) that connected the  
924 corresponding ROIs (nodes).

925



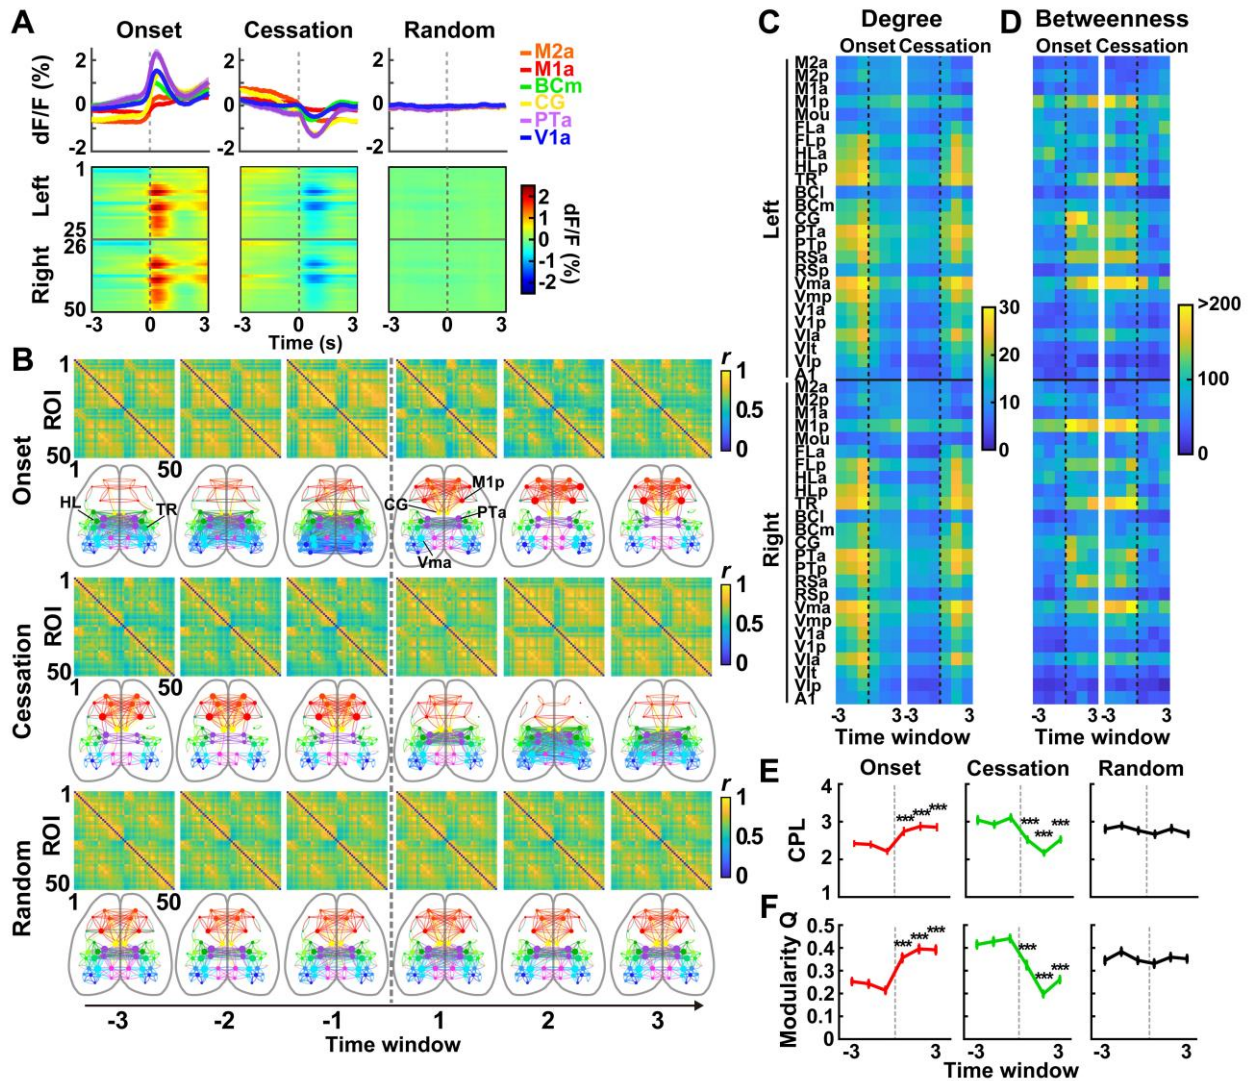

926 **Figure 2. Dynamic reconfiguration of the functional cortical network during behavioral**  
 927 **transitions.**

928 (A) Cortical activity during behavioral transitions in Emx1G6 mice. The top plots present  
 929 average relative changes in fluorescence signals in representative cortical areas ( $n = 89$  sessions  
 930 from 7 mice). The vertical dashed lines indicate the occurrence of transition. The colormaps at  
 931 the bottom show changes in fluorescence signals in all ROIs. ROI 1–25 and 26–50 were defined  
 932 in the left and right hemispheres, respectively (see Figure 1G for details).

933 (B) Dynamics of the functional cortical network during the behavioral transitions. The data for  
 934 locomotion onset, cessation, and random control are shown from top to bottom. Correlation  
 935 matrices and functional connectivity graphs (FC,  $r > 0.8$ ) were determined for each second of  
 936 the time window encompassing the relevant behavioral transition that occurred at time zero  
 937 (vertical dashed line). Time windows -3, -2, -1, 1, 2, 3, correspond to windows that cover -3 s  
 938 to -2 s, -2 s to -1 s, -1 s to 0 s, 0 s to 1 s, 1 s to 2 s and 2 s to 3s, respectively.

939 **(C, D)** Changes in node degree (C) and betweenness centrality (D) during the transitions.  
940 **(E)** Change in characteristic path length (CPL) during the transitions. Data represent mean  $\pm$   
941 SEM. Onset:  $F_{(5, 612)} = 11.35$ ,  $P = 1.7 \times 10^{-10}$ , Cessation:  $F_{(5, 600)} = 19.15$ ,  $P = 1.1 \times 10^{-17}$ , Random:  
942  $F_{(5, 612)} = 0.22$ ,  $P = 0.95$ , one-way ANOVA. \*\*\* $P < 0.001$ , vs. time window -1, Tukey Kramer  
943 test,  $n = 89$  sessions from 7 mice.  
944 **(F)** Change in modularity Q during the transitions. Data represent mean  $\pm$  SEM., Onset:  $F_{(5,$   
945  $612)} = 25.46$ ,  $P = 2.3 \times 10^{-23}$ , Cessation:  $F_{(5, 600)} = 37.20$ ,  $P = 3.0 \times 10^{-23}$ , Random:  $F_{(5, 612)} = 0.51$ ,  
946  $P = 0.77$ , one-way ANOVA. \*\*\* $P < 0.001$ , vs. time window -1, Tukey Kramer test,  $n = 89$   
947 sessions from 7 mice.

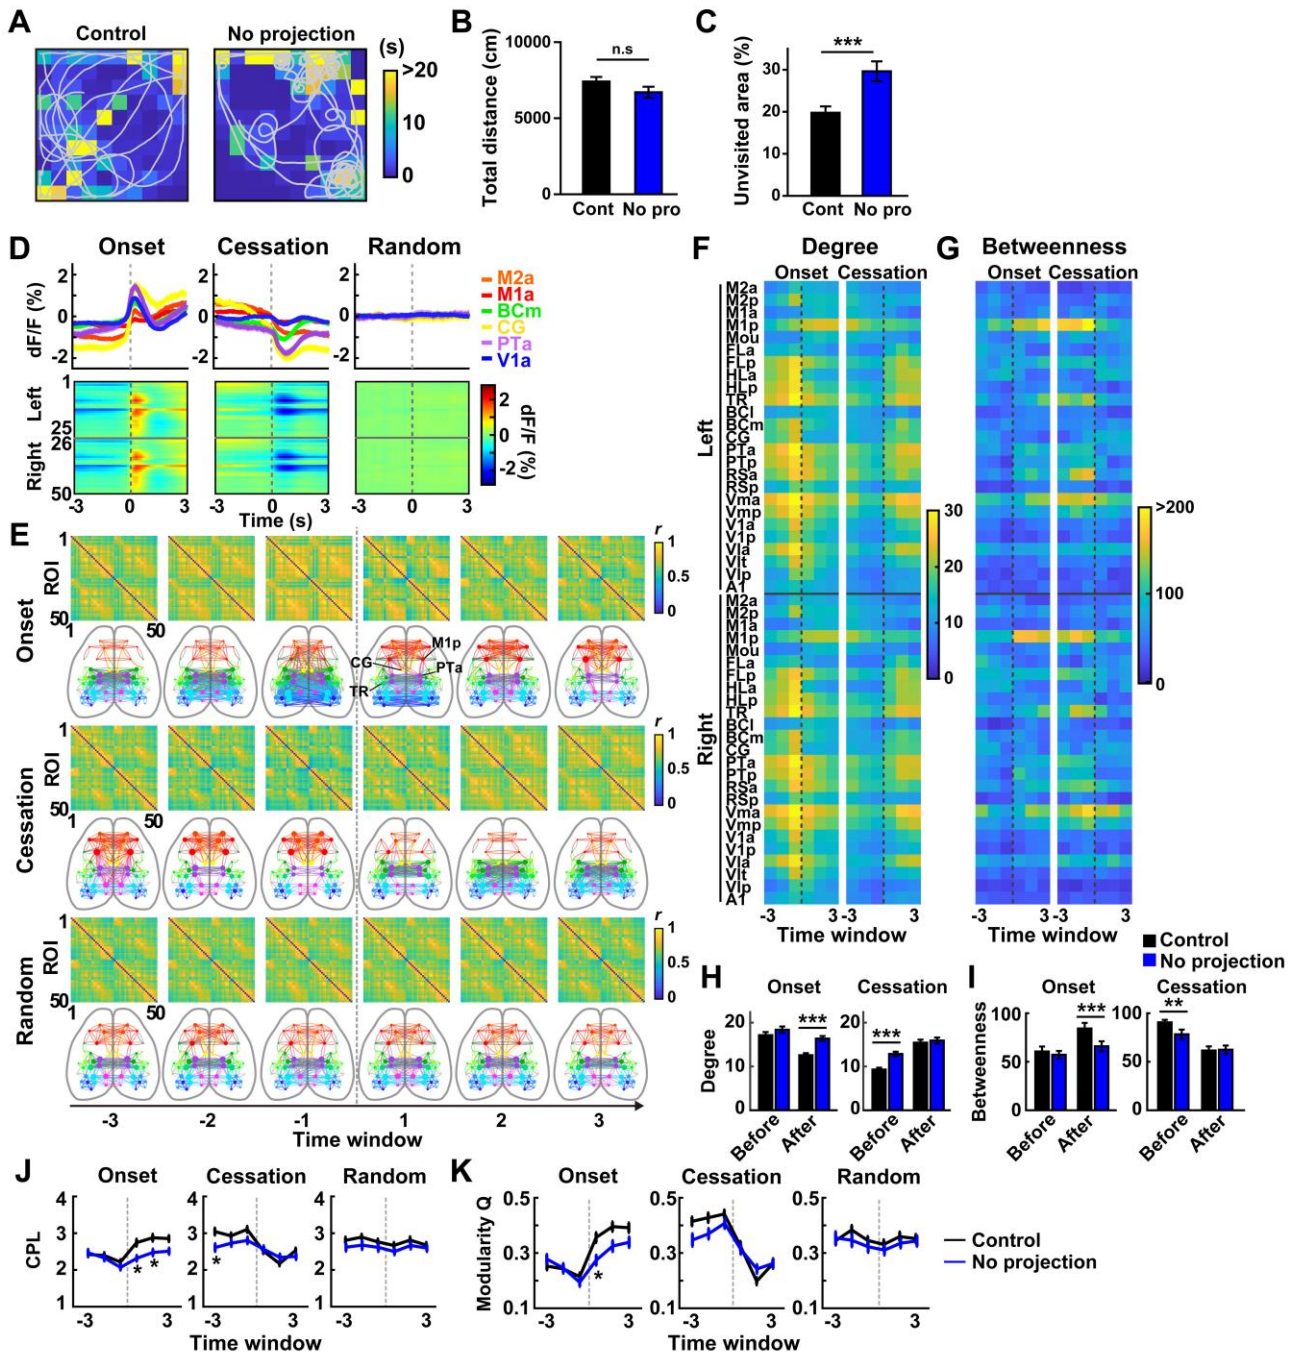

948 **Figure 3. Changes in behavior and functional cortical network during exploration**  
 949 **without visual feedback.**

950 (A) Representative trajectories overlaid onto heatmaps of dwell time during exploration with  
 951 (Control) and without (No projection) visual feedback.

952 (B, C) Distance traveled (B) and percentage of unvisited areas (C) during 10-min sessions with  
 953 (Cont) or without (No pro) visual feedback. Data represent mean  $\pm$  SEM. n.s.,  $P = 0.14$ , \*\*\* $P$

954  $< 0.001$ , t-test,  $n = 89$  control sessions from 7 mice and 71 no projection sessions from 17 mice.

955 **(D)** Cortical activity of Emx1G6 mice without visual feedback. The convention of the figure is  
956 the same as in Figure 2A.

957 **(E)** Dynamics of correlations between activities of ROI pairs during the behavioral transitions  
958 without visual feedback. FC graphs ( $r > 0.8$ ) were generated using the data shown in (D). The  
959 convention of the figure is the same as in Figure 2B.

960 **(F, G)** Changes in node degree (F) and betweenness centrality (G) during the transitions in each  
961 ROI.

962 **(H, I)** Mean node degree (H) and mean betweenness centrality (I) during the transitions. Data  
963 across all ROIs were averaged.  $**P < 0.01$ ,  $***P < 0.001$ , t-test,  $n = 89$  control sessions from  
964 7 mice and 71 no projection sessions from 17 mice.

965 **(J, K)** Change in CPL (J) and modularity Q (K) during the transitions. The control data  
966 presented in Figure 2 are again shown in black for comparison. Data represent mean  $\pm$  SEM.

967 (CPL) Onset, Time:  $F_{(5, 930)} = 11.95$ ,  $P = 3.1 \times 10^{-11}$ ; Genotype:  $F_{(1, 930)} = 22.28$ ,  $P = 2.7 \times 10^{-6}$ ;  
968 Time $\times$ Genotype:  $F_{(5, 930)} = 2.68$ ,  $P = 0.02$ . Cessation, Time:  $F_{(5, 924)} = 19.59$ ,  $P = 1.4 \times 10^{-18}$ ;  
969 Genotype:  $F_{(1, 924)} = 9.47$ ,  $P = 0.002$ ; Time $\times$ Genotype:  $F_{(5, 924)} = 3.29$ ,  $P = 0.006$ ; Random,  
970 Time:  $F_{(5, 948)} = 1.25$ ,  $P = 0.28$ ; Genotype:  $F_{(1, 948)} = 9.65$ ,  $P = 0.002$ ; Time $\times$ Genotype:  $F_{(5, 948)}$   
971  $= 0.12$ ,  $P = 0.99$ ; (modularity Q) Onset, Time:  $F_{(5, 930)} = 29.78$ ,  $P = 4.0 \times 10^{-28}$ ; Genotype:  $F_{(1, 930)}$   
972  $= 11.03$ ,  $P = 9.3 \times 10^{-4}$ ; Time $\times$ Genotype:  $F_{(5, 930)} = 3.19$ ,  $P = 0.007$ ; Cessation, Time:  $F_{(5, 924)}$   
973  $= 44.90$ ,  $P = 1.5 \times 10^{-41}$ ; Genotype:  $F_{(1, 924)} = 4.37$ ,  $P = 0.04$ ; Time $\times$ Genotype:  $F_{(5, 924)} = 2.94$ ,  $P$   
974  $= 0.01$ ; Random, Time:  $F_{(5, 948)} = 1.45$ ,  $P = 0.20$ ; Genotype:  $F_{(1, 948)} = 2.78$ ,  $P = 0.10$ ;  
975 Time $\times$ Genotype:  $F_{(5, 948)} = 0.42$ ,  $P = 0.83$ , two-way ANOVA.  $*P < 0.05$ , vs. control, Tukey  
976 Kramer test.  $n = 89$  control sessions from 7 mice and 71 no projection sessions from 17 mice.

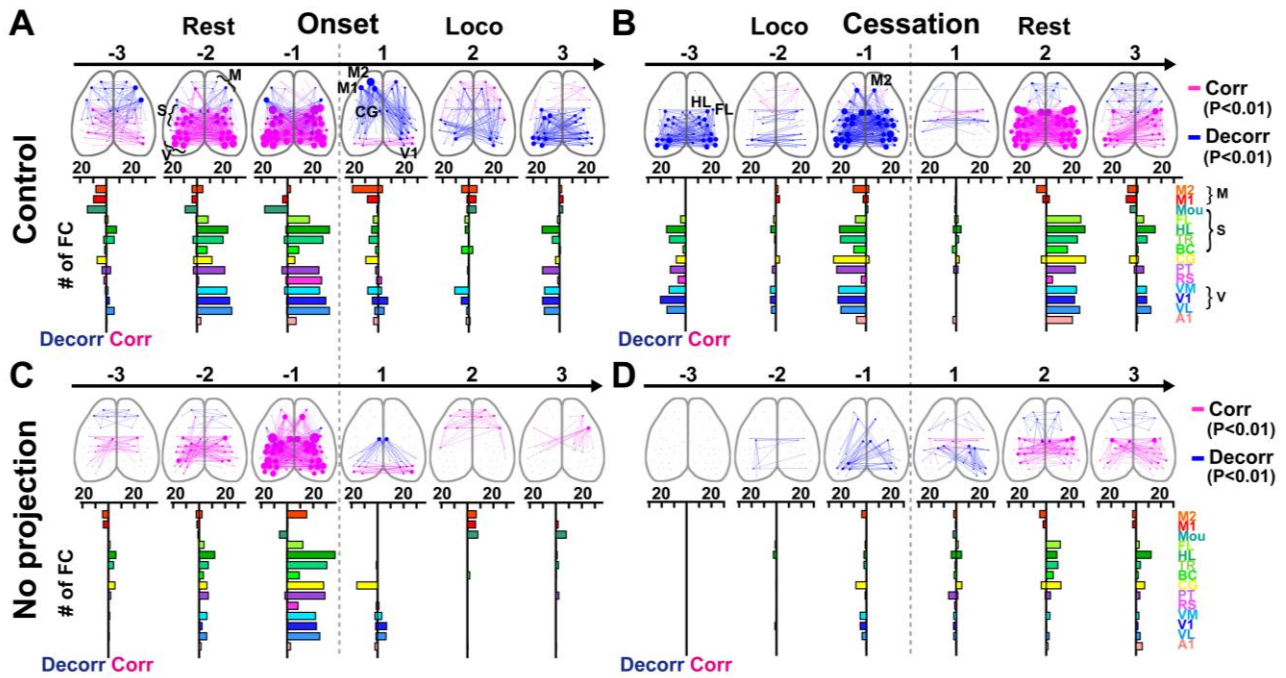

977 **Figure 4. Statistically significant correlations and decorrelations within functional**  
 978 **cortical networks during behavioral transitions with or without visual feedback.**

979 (A, B) Significant correlations and decorrelations of functional cortical subnetworks of  
 980 Emx1G6 mice during locomotion onset in control experiments (A). Network diagrams of  
 981 statistically significant FC during each second before and after the locomotion onset are shown  
 982 from left to right (top). Magenta and blue lines denote significant correlations (Corr) and  
 983 decorrelations (Decor) compared to the random control, respectively. The horizontal bar plots  
 984 (bottom) indicate the number of significant FC (rightward: correlated, leftward: decorrelated)  
 985 connected to each cortical area. The cortical areas are sorted along the antero-posterior axis  
 986 from top to bottom. The values were averaged across bilateral ROIs and further averaged across  
 987 multiple ROIs if the area contained more than one ROI. The same convention applies to  
 988 locomotion cessation (B). Loco, locomotion; M, motor areas; S, somatosensory areas; V, visual  
 989 areas.  $P < 0.01$ , NBS.

990 (C, D) Significant correlations and decorrelations of functional cortical subnetworks during  
 991 locomotion onset (C) and cessation (D) in Emx1G6 mice under no projection of visual  
 992 landscape.  $P < 0.01$ , NBS.

993

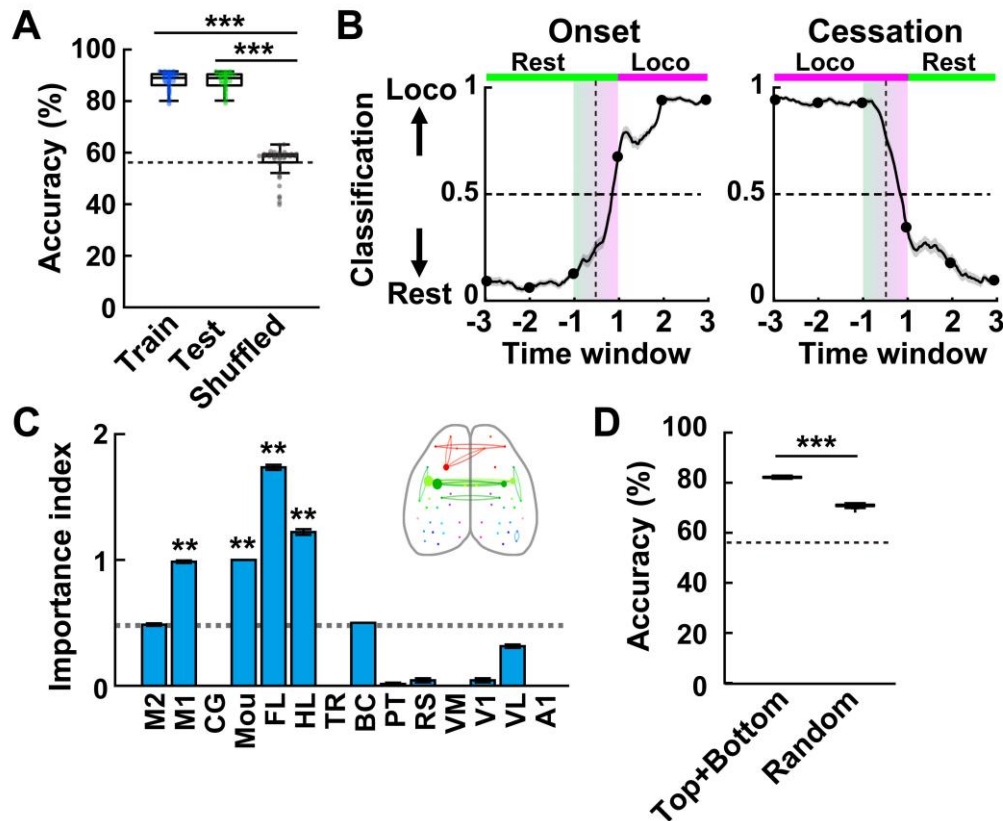

994 **Figure 5. Decoding behavioral states from the functional cortical network on a subsecond**  
 995 **time scale.**

996 (A) Accuracy of SVM classification of FC into the two behavioral states. The results of  
 997 classification for train set (Train), test set (Test), and shuffled control (Shuffled) are shown.  
 998 Data represent averages across entire sessions (17,970 time points each). The boxes represent  
 999 the 25th, 50th, and 75th percentiles, and the whiskers represent the range except for outliers.  
 1000 The dashed line indicates the chance level defined as an overall average of time spent in  
 1001 locomotion (58.7 %). \*\*\* $P < 0.001$ , vs. Shuffled. Wilcoxon rank-sum test with Bonferroni  
 1002 correction.  $n = 35$  classifiers each.

1003 (B) Dynamics of SVM classification of FC during locomotion onset and cessation. Y-axis  
 1004 indicates classification index (1, classified into locomotion state; 0, classified into resting state).  
 1005 The magenta and green bars on the top indicate the periods during locomotion (Loco) and rest,  
 1006 respectively. The gradation bar from -1 to 1 indicates that the time window during this period  
 1007 contained FC from both locomotion and rest periods. Data represents mean  $\pm$  SEM ( $n = 35$   
 1008 classifiers).

1009 (C) Importance index of each cortical area. The index was defined as the number of the  
 1010 appearance of FCs connected to each area in the top 0.5 % and bottom 0.5 % features (see  
 1011 STAR Methods for details). The dashed line indicates a chance level defined as an average of

1012 100-times random sampling of 1 % features. (Inset) Functional networks of the top 0.5 % and  
1013 bottom 0.5 % features (important index:  $\geq 0.2$ ).  $**P < 0.01$ , vs. chance level. Wilcoxon rank-  
1014 sum test with Bonferroni correction.  $n = 35$  classifiers each.

1015 **(D)** Classification accuracy using the top 0.5 % and bottom 0.5 % features (Top+Bottom) and  
1016 randomly selected 1 % features (Random).  $***P < 0.001$ , vs. Random. Wilcoxon rank-sum test.  
1017  $n = 35$  classifiers each.

1018

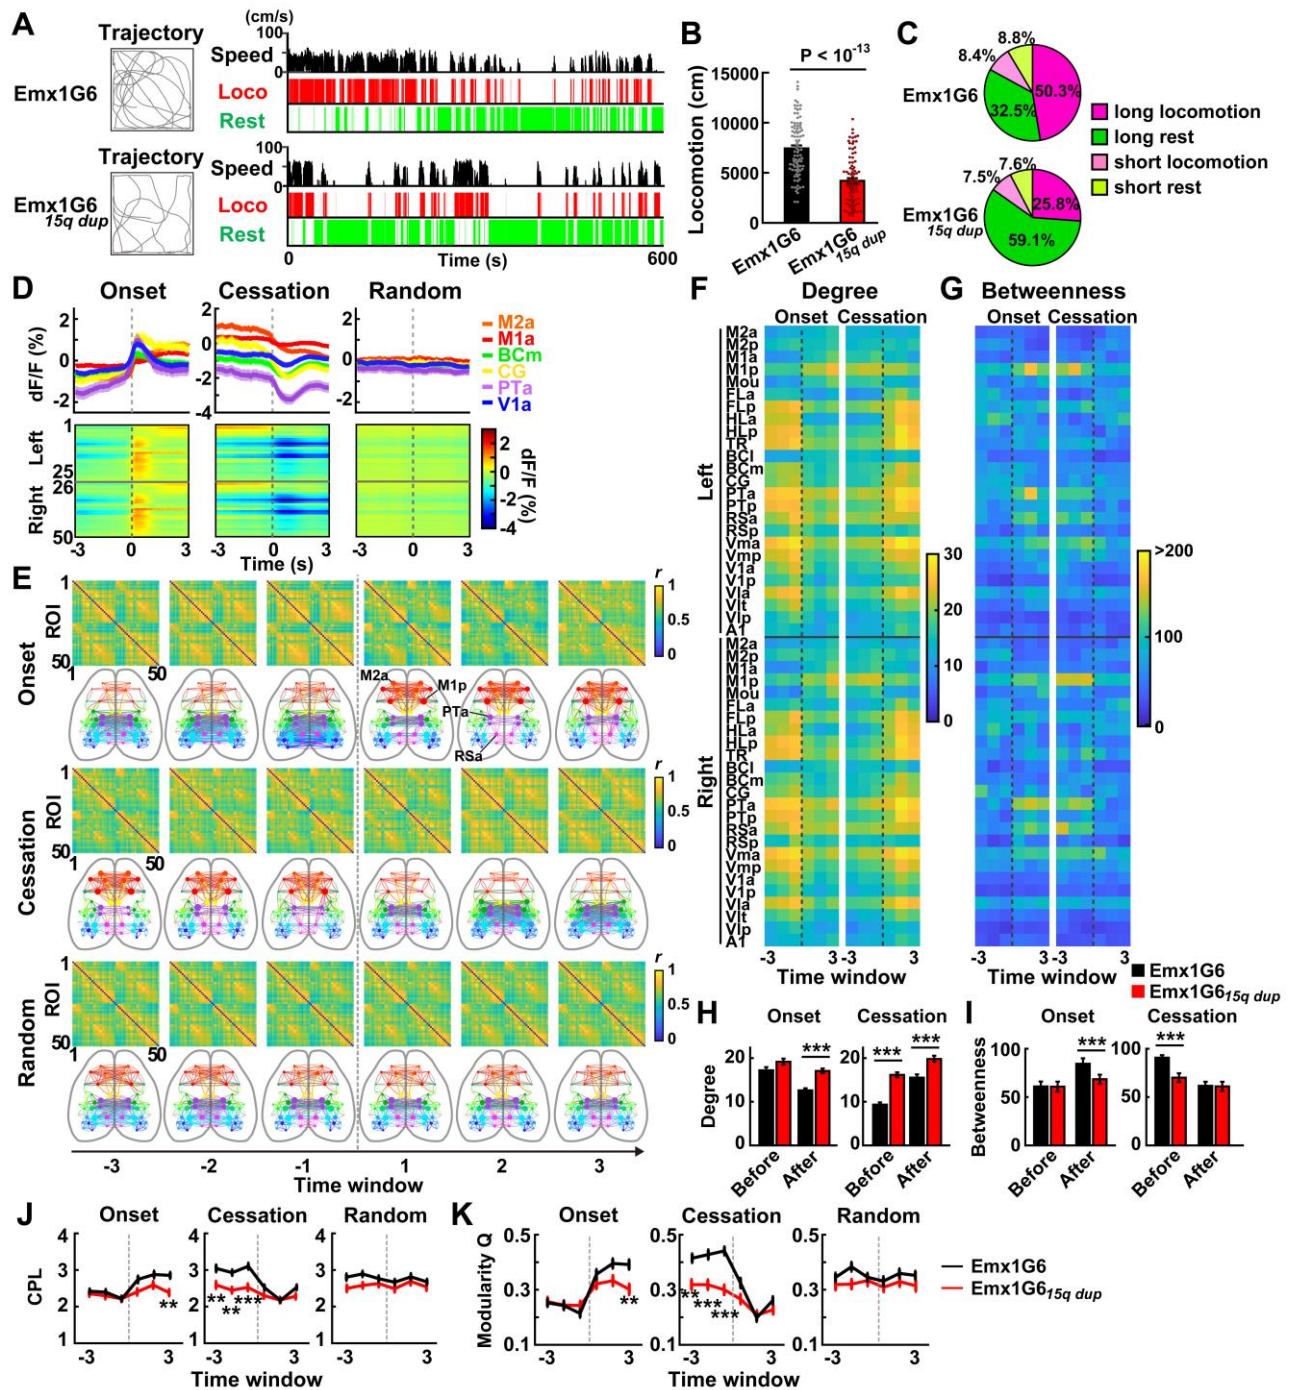

1019 **Figure 6. Hyperconnectivity and lower modularity of functional cortical networks in**  
 1020 **Emx1G6<sup>15q dup</sup> mice during behavioral state transitions.**

1021 (A) Representative trajectory (left) and locomotion behavior (right) for Emx1G6 mice and  
 1022 Emx1G6<sup>15q dup</sup> mice. Locomotion speed, periods of locomotion (Loco), and the rest of each  
 1023 genotype are shown from top to bottom in the right panel.

1024 (B) Locomotor activity of Emx1G6 mice and Emx1G6<sup>15q dup</sup> mice during 10-min sessions. Data  
 1025 represent mean ± SEM. *P*-value by t-test. *n* = 89 sessions from 7 Emx1G6 mice and 88 sessions  
 1026 from 9 Emx1G6<sup>15q dup</sup> mice.



1027 (C) Percentages of time spent for each episode in Emx1G6 mice and Emx1G6<sub>15q dup</sub> mice. Data  
1028 represent averages across all sessions.

1029 (D) Cortical activity of Emx1G6<sub>15q dup</sub> mice during the behavioral transitions. The convention  
1030 of the figure is the same as in Figure 2A.

1031 (E) Dynamics of correlations between activities of ROI pairs during the transitions in  
1032 Emx1G6<sub>15q dup</sub> mice. FC graphs ( $r > 0.8$ ) were generated using the data shown in (D). The  
1033 convention of the figure is the same as in Figure 2B.

1034 (F, G) Changes in node degree (F) and betweenness centrality (G) during the transitions in each  
1035 ROI of Emx1G6<sub>15q dup</sub> mice.

1036 (H, I) Mean node degree (H) and mean betweenness centrality (I) during the transitions. Data  
1037 across all ROIs were averaged. \*\*\* $P < 0.001$ , t-test,  $n = 89$  sessions from 7 Emx1G6 mice and  
1038 88 sessions from 9 Emx1G6<sub>15q dup</sub> mice.

1039 (J, K) Change in CPL (J) and modularity Q (K) during the transitions in Emx1G6<sub>15q dup</sub> mice.  
1040 The data for Emx1G6 mice presented in Figure 2 are again shown in black for comparison.  
1041 Data represent mean  $\pm$  SEM. (CPL) Onset, Time:  $F_{(5, 1014)} = 10.35$ ,  $P = 1.1 \times 10^{-9}$ ; Genotype:  
1042  $F_{(1, 1014)} = 19.09$ ,  $P = 1.4 \times 10^{-5}$ ; Time $\times$ Genotype:  $F_{(5, 1014)} = 2.30$ ,  $P = 0.04$ . Cessation, Time:  $F_{(5,$   
1043  $1026)} = 19.60$ ,  $P = 1.1 \times 10^{-18}$ ; Genotype:  $F_{(1, 1026)} = 47.70$ ,  $P = 8.7 \times 10^{-12}$ ; Time $\times$ Genotype:  $F_{(5,$   
1044  $1026)} = 3.37$ ,  $P = 0.005$ ; Random, Time:  $F_{(5, 1050)} = 1.28$ ,  $P = 0.27$ ; Genotype:  $F_{(1, 1050)} = 16.18$ ,  
1045  $P = 6.2 \times 10^{-5}$ ; Time $\times$ Genotype:  $F_{(5, 1050)} = 0.49$ ,  $P = 0.78$ ; (modularity Q) Onset, Time:  $F_{(5, 1014)}$   
1046  $= 25.25$ ,  $P = 4.7 \times 10^{-24}$ ; Genotype:  $F_{(1, 1014)} = 6.73$ ,  $P = 0.01$ ; Time $\times$ Genotype:  $F_{(5, 1014)} = 3.53$ ,  
1047  $P = 0.004$ ; Cessation, Time:  $F_{(5, 1026)} = 38.98$ ,  $P = 1.0 \times 10^{-36}$ ; Genotype:  $F_{(1, 1026)} = 53.33$ ,  $P =$   
1048  $5.6 \times 10^{-13}$ ; Time $\times$ Genotype:  $F_{(5, 1026)} = 5.49$ ,  $P = 5.4 \times 10^{-5}$ ; Random, Time:  $F_{(5, 1050)} = 0.82$ ,  $P =$   
1049  $0.54$ ; Genotype:  $F_{(1, 1050)} = 10.23$ ,  $P = 0.001$ ; Time $\times$ Genotype:  $F_{(5, 1050)} = 0.52$ ,  $P = 0.76$ , two-  
1050 way ANOVA. \*\* $P < 0.01$ , \*\*\* $P < 0.001$ , vs. Emx1G6, Tukey Kramer test.  $n = 89$  sessions  
1051 from 7 Emx1G6 mice and 88 sessions from 9 Emx1G6<sub>15q dup</sub> mice.

1052

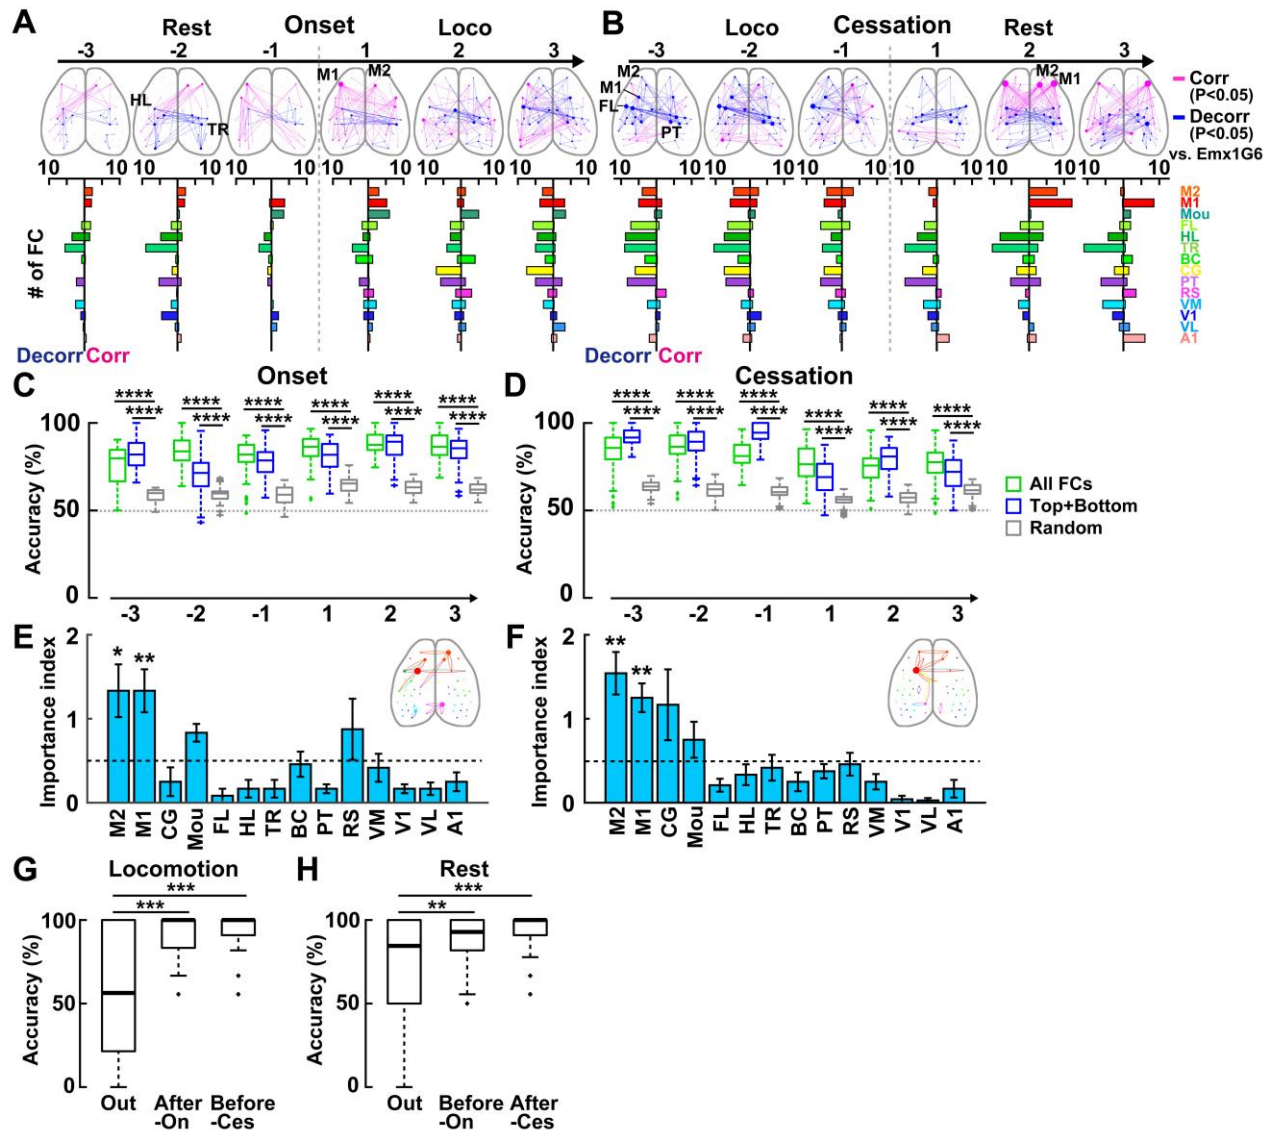

1053 **Figure 7. Importance of motor areas and behavioral transitions in distinguishing cortical**  
 1054 **FC between *Emx1G6<sup>15q dup</sup>* and *Emx1G6* mice.**

1055 **(A, B)** Statistically significant FC of *Emx1G6<sup>15q dup</sup>* mice during locomotion onset (A) and  
 1056 cessation (B) compared to *Emx1G6* mice. The convention of the figure is the same as in Figure  
 1057 4A.  $P < 0.05$ , NBS.

1058 **(C, D)** Accuracy of SVM classification of FC into two genotypes during locomotion onset (C)  
 1059 and cessation (D). Classifiers were trained with all 1,225 features (All FCs), top 0.5 % and  
 1060 bottom 0.5 % features (Top+Bottom), or randomly chosen 1 % features (Random) at each time  
 1061 point. The boxes represent the 25th, 50th, and 75th percentiles, and the whiskers represent the  
 1062 range except for outliers. \*\*\*\* $P < 0.001$ , vs. Random, Wilcoxon rank-sum test with Bonferroni  
 1063 correction.  $n = 63$  classifiers each.

1064 **(E, F)** The importance index of each cortical area in the SVM classification of FC during

1065 locomotion onset (E) and cessation (F) was averaged across all relevant time points. Data  
1066 represent mean  $\pm$  SEM ( $n = 6$  time points). The dashed line indicates a chance level defined as  
1067 an average of 100-times random sampling of 1 % features. (Inset) Functional networks of the  
1068 top 0.5 % and bottom 0.5 % features ( $\geq 2$  time points).  $*P < 0.05$ ,  $**P < 0.01$ , vs. chance level,  
1069 Wilcoxon rank-sum test with Bonferroni correction.

1070 **(G, H)** Accuracy of SVM genotype classifiers trained with FC during locomotion (G) and rest  
1071 (H) with or without transitions. The periods of locomotion were subdivided into those that  
1072 occurred immediately after locomotion onset (After-On), immediately before locomotion  
1073 cessation (Before-Ces), and outside these two types of periods (Out). Similarly, the periods of  
1074 rest were subdivided into those that occurred immediately before locomotion onset (Before-  
1075 On), immediately after locomotion cessation (After-Ces), and outside these two types of  
1076 periods (Out).  $**P < 0.01$ ,  $***P < 0.001$ , vs. Out, Wilcoxon rank-sum test with Bonferroni  
1077 correction.  $n = 63$  classifiers each.

1078 **Supplementary information**

1079 Figure S1. Validation of regions of interest by sensory and motor mapping.

1080 Figure S2. Estimation of the contribution of intrinsic fluorescence signals to the total signals  
1081 acquired from GCaMP transgenic mice.

1082 Figure S3. Hierarchical clustering of cortical activity during locomotion onset and cessation.

1083 Figure S4. Relationship between node degree, betweenness centrality, and fluorescence  
1084 changes.

1085 Figure S5. The functional cortical network after hemodynamic correction.

1086 Figure S6. Fluorescent signal intensities in the cortical areas of *Emx1G6* and *Emx1G6<sup>15q dup</sup>*  
1087 mice.

1088 Figure S7. Sensory mapping of *Emx1G6<sup>15q dup</sup>* mice.

1089 Figure S8. Abnormal correlations and decorrelations among cortical areas during behavioral  
1090 transitions in *Emx1G6<sup>15q dup</sup>* mice.

1091
